# Supplementary material
Source: PubMed Central journal article supplement (PMC7301604)
Supplement: ao0c01525_si_001.pdf [file ao0c01525_si_001.pdf]

## Supporting Information

### Synthesis and Cytotoxicity on Human Lung Cancer Cell Lines of 2- Arylidene and Related Analogs of Malabaricol

S Srividya Bommakanti,<sup>1</sup> Lakshmi Srinivasa Rao Kundeti,<sup>1</sup> Venkateshwarlu Saddanapu<sup>2</sup> and Kommu Nagaiah<sup>1\*</sup>

<sup>1</sup>Centre for Natural Products & Traditional Knowledge, CSIR-Indian Institute of Chemical Technology, Tarnaka, Hyderabad-500007, India.

<sup>2</sup>Department of Applied Biology, CSIR-Indian Institute of Chemical Technology, Tarnaka, Hyderabad-500007, India.

#### Table of Contents:

| Serial No. | Description                                                                 | Page No. |
|------------|-----------------------------------------------------------------------------|----------|
| 1.1        | General Information                                                         | S2       |
| 1.2        | General Experimental Procedure for Synthesis of Derivatives ( <b>1-22</b> ) | S3-S14   |
| 1.3        | <sup>1</sup> H NMR and <sup>13</sup> C NMR Spectra                          | S15-S36  |

## General Information

Malabaricol plant resin was collected from Karnataka state, India. Solvents and chemicals were purchased from local vendors, and used as received. Reactions were monitored using thin-layer chromatography (TLC) with 0.25 mm E. Merck pre-coated silica gel plates (60 F254) and visualization was accomplished with either UV light, iodine adsorbed on silica gel or immersion in an ethanolic solution of *p*-anisaldehyde stain followed by heating. The column chromatography was carried out on silica gel (60-120 mesh). All  $^1\text{H}$ NMR spectra were recorded on Bruker at 400 or 500 MHz and All  $^{13}\text{C}$  NMR spectra recorded on Bruker at 100 or 125 MHz, respectively. Chemical shifts ( $\delta$ ) were reported in parts per million (ppm) and calibrated to the residual proton and carbon resonance of the  $\text{CDCl}_3$  ( $\delta_{\text{H}} = 7.26$  and  $\delta_{\text{C}} = 77.0$  ppm). The coupling constants ( $J$ ) were given in Hz. High-Resolution mass spectrometry (HRMS) was recorded using electrospray ionization (ESI)-Time-off light techniques. FTIR spectra were recorded with a Bruker Alpha spectrophotometer and were reported in  $\text{cm}^{-1}$ . Cellular viability in the presence of test compounds was determined by MTT-microcultured tetrazolium assay. The cells seeded to flat bottom 96 (10000 cells/100  $\mu\text{L}$ ) well plates cultured in the medium containing 10% serum and allowed to attach and recover for 24 hours in a humid chamber containing 5%  $\text{CO}_2$ . MTT (3-(4, 5-dimethylthiazol-2yl)-2,5diphenyl tetrazolium bromide) was dissolved in PBS at 5mg/ml and filtered to sterilize and remove a small amount of insoluble residue present MTT. Different concentrations of compounds were added to the cells. After 48 hours, stock MTT solution (10  $\mu\text{L}$ ) was added to the culture plate. Cells were again kept in  $\text{CO}_2$  incubator for 2 hours. After incubation 100  $\mu\text{L}$  of DMSO was added and mixed. The absorbance was read at 562 nm in a plate reader. The results were represented as percentage of cytotoxicity/viability. All the experiments were carried out in duplicates. From the percentage of cytotoxicity the  $\text{IC}_{50}$  value calculated.

## General Experimental Methods:

### *Synthesis of 2- arylidene derivatives*

To the stirred solution of malabaricol **1** (100 mg, 218  $\mu\text{mol}$ ) in ethanol (3 ml) was added KOH (73.3 mg, 1.30 mmol) at room temperature. After half an hour benzaldehyde (67  $\mu\text{L}$ , 654  $\mu\text{mol}$ ) was added to reaction mixture. The resulting mixture was stirred at room temperature for 12 h. The solvent was removed and extracted with diethyl ether (3 x 50 mL), washed with brine and dried over  $\text{Na}_2\text{SO}_4$ . The obtained residue was purified by column chromatography (9/91, EtOAc/hexane) to get desired product **2a** (79.8 mg, 67%) as a light green viscous liquid. Yield: IR (Neat)  $\nu_{\text{max}}$  2962, 2874, 1673, 1449, 1028, 904, 665  $\text{cm}^{-1}$ ;  $^1\text{H}$  NMR (500 MHz,  $\text{CDCl}_3$ ):  $\delta$  = 7.54 (s, 1H), 7.46 – 7.38 (m, 4H), 7.33 (m, 1H), 5.12 (t,  $J$  = 7.1 Hz, 1H), 3.70 (t,  $J$  = 7.0 Hz, 1H), 2.94 (d,  $J$  = 15.8 Hz, 1H), 2.31 (d,  $J$  = 15.8 Hz, 1H), 2.17-1.31 (m, 25 H), 1.25 (s, 3H), 1.21 (s, 3H), 1.17 (s, 3H), 1.15 (s, 3H), 0.96 (s, 3H), 0.81 (s, 3H);  $^{13}\text{C}$  NMR (100 MHz,  $\text{CDCl}_3$ ):  $\delta$  = 207.7, 137.6, 135.9, 133.8, 131.5, 130.3, 128.4, 128.3, 124.5, 85.6, 82.1, 72.7, 59.6, 57.1, 53.1, 45.1, 44.9, 43.9, 38.1, 37.6, 36.3, 36.0, 29.6, 29.5, 26.0, 25.6, 25.1, 24.3, 23.8, 22.3, 22.2, 21.5, 21.4, 17.6, 15.6; HRMS (ESI+) calculated for  $[\text{C}_{37}\text{H}_{54}\text{O}_3 - \text{H}]^+$ : 545.3995, Found: 545.4008.

### *Compound 2b*

The compound **2b** was prepared according to the general procedure described above by the reaction between malabaricol **1** with 4- methoxybenzaldehyde and purified by column chromatography (9/91, EtOAc/hexane) as a light green viscous liquid. Yield: 84.7 mg (67.4%); IR (Neat)  $\nu_{\text{max}}$  2959, 2873, 1669, 1458, 1032, 907, 665  $\text{cm}^{-1}$ ;  $^1\text{H}$  NMR (400 MHz,  $\text{CDCl}_3$ ):  $\delta$  =

7.52 (s, 1H), 7.42 (d,  $J = 8.8$  Hz, 2H), 6.94 (d,  $J = 8.8$  Hz, 2H), 5.12 (t,  $J = 7.0$  Hz, 1H), 3.84 (s, 3H), 3.71 (t,  $J = 6.9$  Hz, 1H), 2.92 (d,  $J = 15.5$  Hz, 1H), 2.30 (d,  $J = 15.5$  Hz, 1H), 2.18-1.30 (m, 25H), 1.25 (s, 3H), 1.21 (s, 3H), 1.17 (s, 3H), 1.13 (s, 3H), 0.96 (s, 3H), 0.81 (s, 3H);  $^{13}\text{C}$  NMR (100 MHz,  $\text{CDCl}_3$ ):  $\delta = 207.6, 159.8, 137.5, 132.1, 131.6, 131.5, 128.5, 124.5, 113.9, 85.6, 82.1, 72.7, 59.9, 57.2, 55.2, 52.9, 45.1, 44.9, 43.9, 38.0, 37.5, 36.3, 35.9, 29.7$  (2C), 26.0, 25.6, 25.1, 24.3, 23.8, 22.2, 22.1, 21.6, 21.4, 17.6, 15.6; HRMS (ESI+) calculated for  $[\text{C}_{38}\text{H}_{56}\text{O}_4 + \text{H}]^+$ : 577.4251, Found: 577.4267.

### ***Compound 2c***

The compound **2c** was prepared according to the general procedure described above by the reaction between malabaricol **1** with 1-naphthaldehyde and purified by column chromatography (9/91, EtOAc/hexane) as a light green viscous liquid. Yield 83.6 mg (64.3%); IR (Neat)  $\nu_{\text{max}}$  2958, 2853, 1676, 1459, 1078, 907, 666  $\text{cm}^{-1}$ ;  $^1\text{H}$  NMR (400 MHz,  $\text{CDCl}_3$ ):  $\delta = 7.90$  (s, 1H), 7.88-7.80 (m, 3H), 7.71 (s, 1H), 7.54 (dd,  $J = 8.5, 1.5$  Hz, 1H), 7.52-7.47 (m, 1H), 5.12 (t,  $J = 6.9$  Hz, 1H), 3.71 (t,  $J = 6.8$  Hz, 1H), 3.05 (d,  $J = 16.2$  Hz, 1H), 2.42 (d,  $J = 16.1$  Hz, 1H), 2.20-1.31 (m, 26H), 1.26 (s, 3H), 1.22 (s, 3H), 1.19 (s, 6H), 0.96 (s, 3H), 0.83 (s, 3H);  $^{13}\text{C}$  NMR (100 MHz,  $\text{CDCl}_3$ ):  $\delta = 207.6, 137.7, 134.1, 133.4, 133.0, 132.9, 131.5, 130.2, 128.4, 127.8, 127.5, 127.5, 126.7, 126.3, 124.5, 85.6, 82.1, 72.7, 59.7, 57.1, 53.1, 45.2, 45.0, 43.9, 38.1, 37.6, 36.4, 36.1, 29.6, 29.5, 26.0, 25.6, 25.1, 24.3, 23.8, 22.3, 22.2, 21.5, 21.3, 17.6, 15.6$ ; HRMS (ESI+) calculated for  $[\text{C}_{41}\text{H}_{56}\text{O}_3 + \text{H}]^+$ : 597.4302, Found: 597.4301.

### ***Compound 2d***

The compound **2d** was prepared according to the general procedure described above by the reaction between malabaricol **1** with 4-nitrobenzaldehyde and purified by column chromatography (9/91, EtOAc/hexane) as a light green viscous liquid. Yield 70.4 mg (54.6%);

IR (Neat)  $\nu_{max}$  2961, 2872, 1678, 1454, 1074, 906, 666  $\text{cm}^{-1}$ ;  $^1\text{H}$  NMR (400 MHz,  $\text{CDCl}_3$ ):  $\delta$  = 8.26 (d,  $J$  = 8.6 Hz, 2H), 7.55 (d,  $J$  = 8.6 Hz, 2H), 7.53 (s, 1H), 5.11 (t,  $J$  = 7.0 Hz, 1H), 3.71 (t,  $J$  = 7.0 Hz, 1H), 2.87 (d,  $J$  = 16.3 Hz, 1H), 2.38-1.33 (m, 26H), 1.25 (s, 3H), 1.21 (s, 3H), 1.18 (s, 3H), 1.17 (s, 3H), 0.97 (s, 3H), 0.82 (s, 3H);  $^{13}\text{C}$  NMR (100 MHz): 207.3, 147.8, 142.3, 137.4, 131.5, 130.6, 124.5, 123.6, 85.5, 82.1, 72.8, 59.5, 57.0, 53.1, 45.3, 44.8, 43.9, 38.0, 37.6, 36.2, 36.1, 29.6, 29.3, 25.9, 25.6, 25.1, 24.3, 23.8, 22.3, 22.1, 21.5, 21.3, 17.6, 15.6; HRMS (ESI+) calculated for  $[\text{C}_{37}\text{H}_{53}\text{NO}_5 - \text{H}]^+$ : 590.3840, Found: 590.3856.

### ***Compound 2e***

The compound **2e** was prepared according to the general procedure described above by the reaction between malabaricol **1** with 3-nitrobenzaldehyde and purified by column chromatography (9/91, EtOAc/hexane) as a light green viscous liquid. Yield 77.0 mg (59.7%); IR (Neat)  $\nu_{max}$  2961, 2871, 1678, 1455, 1074, 905, 665  $\text{cm}^{-1}$ ;  $^1\text{H}$  NMR  $\delta$  8.28 (s, 1H), 8.18 (dd,  $J$  = 1.8, 7.3 Hz, 1H), 7.72 (d,  $J$  = 7.7 Hz, 1H), 7.59 (t,  $J$  = 7.8 Hz, 1H), 7.52 (s, 1H), 5.11 (t,  $J$  = 6.9 Hz, 1H), 3.71 (t,  $J$  = 6.7 Hz, 1H), 2.89 (d,  $J$  = 15.5 Hz, 1H), 2.35 (d,  $J$  = 15.5 Hz, 1H), 2.18-1.29 (m, 19H), 1.68 (s, 3H), 1.62 (s, 3H), 1.25 (s, 3H), 1.21 (s, 3H), 1.18 (s, 3H), 1.17 (s, 3H), 0.97 (s, 3H), 0.84 (s, 3H).  $^{13}\text{C}$  NMR (100 MHz):  $\delta$  207.1, 148.1, 137.4, 136.5, 135.6, 134.4, 131.3, 129.3, 124.5, 124.3, 122.8, 85.4, 82.0, 72.6, 56.9, 53.0, 45.2, 44.6, 43.8, 37.9, 37.6, 36.0, 29.3, 25.9, 25.5, 25.0, 24.1, 22.1, 22.1, 21.4, 21.2, 17.5, 15.6. HRMS (ESI+) calculated for  $[\text{C}_{37}\text{H}_{53}\text{NO}_5 - \text{OH}]^+$ : 575.3975, Found: 575.3960.

### ***Compound 2f***

The compound **2f** was prepared according to the general procedure described above by the reaction between malabaricol **1** with 2-nitrobenzaldehyde and purified by column chromatography (9/91, EtOAc/hexane) as a light green viscous liquid. Yield 68.3 mg (53%); IR

(Neat)  $\nu_{max}$  2962, 2871, 1679, 1455, 1075, 903, 666  $\text{cm}^{-1}$ ;  $^1\text{H}$  NMR (400 MHz,  $\text{CDCl}_3$ ):  $\delta$  = 8.12 (dd,  $J$  = 8.1, 1.2 Hz, 1H), 7.64 (ddd,  $J$  = 15.0, 7.4, 1.2 Hz, 2H), 7.50 (ddd,  $J$  = 15.6, 8.0, 0.8 Hz, 1H), 7.30 (d,  $J$  = 7.7 Hz, 1H), 5.10 (t,  $J$  = 7.0 Hz, 1H), 3.68 (t,  $J$  = 7.3 Hz, 1H), 2.53 (d,  $J$  = 15.2 Hz, 1H), 2.09-1.95 (m, 2H), 1.85-1.24 (m, 24H), 1.21 (s, 6H), 1.18 (s, 3H), 1.15 (s, 3H), 0.98 (s, 3H), 0.84 (s, 3H);  $^{13}\text{C}$  NMR (100 MHz,  $\text{CDCl}_3$ ):  $\delta$  = 207.1, 148.1, 135.8, 134.1, 133.1, 132.2, 131.5, 130.9, 128.7, 124.8, 124.5, 85.5, 82.1, 72.7, 59.4, 56.9, 53.7, 45.9, 44.0, 43.6, 38.0, 37.5, 36.5, 29.6, 29.3, 28.6, 25.9, 25.6, 25.2, 24.3, 22.6, 22.3, 22.1, 21.2, 21.1, 17.5, 15.5. HRMS (ESI+) calculated for  $[\text{C}_{37}\text{H}_{53}\text{NO}_5 + \text{NH}_4]^+$ : 609.4262, Found: 609.4261.

### **Compound 2g**

The compound **2g** was prepared according to the general procedure described above by the reaction between malabaricol **1** with 4-methylbenzaldehyde and purified by column chromatography (9/91, EtOAc/hexane) as a light green viscous liquid. Yield 76.1 mg (62.3%); IR (Neat)  $\nu_{max}$  2962, 2874, 1671, 1452, 1073, 906, 666  $\text{cm}^{-1}$ ;  $^1\text{H}$  NMR (400 MHz,  $\text{CDCl}_3$ ):  $\delta$  = 7.53 (s, 1H), 7.34 (d,  $J$  = 8.1 Hz, 2H), 7.21 (d,  $J$  = 8.0 Hz, 2H), 5.12 (t,  $J$  = 6.9 Hz, 1H), 3.71 (t,  $J$  = 6.9 Hz, 1H), 2.93 (d,  $J$  = 16.2 Hz, 1H), 2.38 (s, 3H), 2.34-2.27 (m, 1H), 2.14-1.30 (m, 25H), 1.25 (s, 3H), 1.21 (s, 3H), 1.16 (s, 3H), 1.14 (s, 3H), 0.96 (s, 3H), 0.81 (s, 3H);  $^{13}\text{C}$  NMR (100 MHz,  $\text{CDCl}_3$ ):  $\delta$  = 207.7, 138.6, 137.7, 133.0, 132.9, 131.5, 130.4, 129.1, 124.5, 85.6, 82.1, 72.7, 59.8, 57.1, 53.0, 45.0, 45.0, 43.9, 38.0, 37.6, 36.3, 35.9, 29.6, 26.0, 25.6, 25.1, 24.3, 23.8, 22.2, 22.1, 21.5, 21.3, 21.3, 17.6, 15.6; HRMS (ESI+) calculated for  $[\text{C}_{38}\text{H}_{56}\text{O}_3 + \text{H}]^+$ : 561.4302, Found: 561.4308.

### **Compound 2h**

The compound **2h** was prepared according to the general procedure described above by the reaction between malabaricol **1** with 4-*tert*-butylbenzaldehyde and purified by column

chromatography (9/91, EtOAc/hexane) as a light green viscous liquid. Yield 83.0 mg (63.2%); IR (Neat)  $\nu_{max}$  2957, 2852, 1672, 1461, 1078, 908, 665  $\text{cm}^{-1}$ ;  $^1\text{H}$  NMR (500 MHz,  $\text{CDCl}_3$ ):  $\delta$  = 7.52 (s, 1H), 7.46-7.38 (m, 4 H), 5.12 (t,  $J$  = 7.1 Hz, 1H), 3.71 (t,  $J$  = 6.8 Hz, 1H), 2.96 (d,  $J$  = 16.0 Hz, 1H), 2.33 (d,  $J$  = 16.0 Hz, 1H), 2.17-1.39 (m, 25H), 1.34 (s, 9H), 1.25 (s, 3H), 1.21 (s, 3H), 1.17 (s, 3H), 1.13 (s, 3H), 0.96 (s, 3H), 0.81 (s, 3H);  $^{13}\text{C}$  NMR (100 MHz,  $\text{CDCl}_3$ ):  $\delta$  = 207.8, 151.8, 137.5, 133.0, 133.0, 131.5, 130.3, 125.4, 124.5, 85.6, 82.1, 72.7, 57.1, 53.0, 45.1, 45.0, 43.9, 38.1, 37.6, 35.9, 34.7, 31.1, 29.8, 25.6, 25.1, 24.3, 22.2, 22.2, 21.6, 21.4, 17.6, 15.6; HRMS (ESI+) calculated for  $[\text{C}_{41}\text{H}_{62}\text{O}_3 + \text{H}]^+$ : 603.4772, Found: 603.4776.

### ***Compound 2i***

The compound **2i** was prepared according to the general procedure described above by the reaction between malabaricol **1** with 2,4-dichlorobenzaldehyde and purified by column chromatography (9/91, EtOAc/hexane) as a light green viscous liquid. Yield 86.2 mg (64.3%); IR (Neat)  $\nu_{max}$  2960, 2872, 1678, 1466, 1054, 904, 665  $\text{cm}^{-1}$ ;  $^1\text{H}$  NMR (500 MHz,  $\text{CDCl}_3$ ):  $\delta$  = 7.56 (d,  $J$  = 1.9 Hz, 1H), 7.44 (d,  $J$  = 2.0 Hz, 1H), 7.28-7.19 (m, 2H), 5.11 (t,  $J$  = 7.2 Hz, 1H), 3.69 (t,  $J$  = 7.2 Hz, 1H), 2.68 (d,  $J$  = 15.8 Hz, 1H), 2.18-1.29 (m, 26H), 1.22 (s, 3H), 1.19 (s, 3H), 1.18 (s, 3H), 1.15 (s, 3H), 0.95 (s, 3H), 0.82 (s, 3H);  $^{13}\text{C}$  NMR (100 MHz,  $\text{CDCl}_3$ ): 207.1, 136.2, 135.5, 134.4, 133.3, 132.8, 131.5, 130.8, 129.5, 126.6, 124.5, 85.5, 82.1, 72.7, 59.7, 57.1, 53.5, 45.6, 44.0, 38.0, 37.5, 36.3, 29.6, 29.3, 28.9, 25.9, 25.6, 25.2, 24.3, 23.8, 22.6, 22.3, 22.1, 21.3, 21.2, 17.6, 15.5; HRMS (ESI+) calculated for  $[\text{C}_{37}\text{H}_{52}\text{Cl}_2\text{O}_3 - \text{H}]^+$ : 613.3216, Found: 613.3210.

### ***Compound 2j***

The compound **2j** was prepared according to the general procedure described above by the reaction between malabaricol **1** with 4-chlorobenzaldehyde and purified by column chromatography (9/91, EtOAc/hexane) as a light green viscous liquid. Yield 72.1 mg (57%); IR

(Neat)  $\nu_{max}$  2958, 2853, 1678, 1462, 1078, 908, 666  $\text{cm}^{-1}$ ;  $^1\text{H}$  NMR (400 MHz,  $\text{CDCl}_3$ ):  $\delta$  = 7.48 (d,  $J$  = 1.4 Hz, 1H), 7.39 - 7.32 (m, 4H), 5.12 (t,  $J$  = 7.0 Hz, 1H), 3.71 (t,  $J$  = 7.0 Hz, 1H), 2.87 (d,  $J$  = 16.2 Hz, 1H), 2.31-2.20 (m, 2H), 2.18-1.31 (m, 22H), 1.26 (s, 3H), 1.25 (s, 3H), 1.21 (s, 3H), 1.16 (s, 3H), 1.15 (s, 3H), 0.96 (s, 3H), 0.81 (s, 3H);  $^{13}\text{C}$  NMR (125 MHz,  $\text{CDCl}_3$ ):  $\delta$  = 207.5, 136.2, 134.3, 131.5, 131.4, 128.6, 124.5, 85.6, 82.1, 72.7, 59.7, 57.2, 53.0, 45.1, 44.8, 43.9, 38.0, 37.6, 36.0, 29.6, 29.6, 29.5, 29.3, 25.9, 25.6, 25.1, 24.3, 23.8, 22.6, 22.2, 22.1, 21.5, 21.3, 17.6, 15.6; HRMS (ESI+) calculated for  $[\text{C}_{37}\text{H}_{53}\text{O}_3\text{Cl} - \text{OH}]^+$ : 563.3656, Found: 563.3642.

### **Compound 2k**

The compound **2k** was prepared according to the general procedure described above by the reaction between malabaricol **1** with 4-bromobenzaldehyde and purified by column chromatography (9/91, EtOAc/hexane) as a light green viscous liquid. Yield 75.4 mg (55.4%); IR (Neat)  $\nu_{max}$  2963, 2874, 1674, 1453, 1073, 906, 666  $\text{cm}^{-1}$ ;  $^1\text{H}$  NMR (400 MHz,  $\text{CDCl}_3$ ):  $\delta$  = 7.53 (d,  $J$  = 8.4 Hz, 2H), 7.45 (s, 1H), 7.31-7.25 (m, 2H), 5.12 (t,  $J$  = 7.0 Hz, 1H), 3.71 (t,  $J$  = 6.9 Hz, 1H), 2.86 (d,  $J$  = 16.5 Hz, 1H), 2.38 (s, 1H), 2.26 (d,  $J$  = 16.5 Hz, 1H), 2.18-1.29 (m, 24H), 1.25 (s, 3H), 1.21 (s, 3H), 1.16 (s, 3H), 1.14 (s, 3H), 0.96 (s, 3H), 0.80 (s, 3H);  $^{13}\text{C}$  NMR (100 MHz,  $\text{CDCl}_3$ ):  $\delta$  = 207.5, 136.2, 134.7, 134.5, 131.6, 131.5, 131.5, 124.5, 122.6, 85.5, 82.1, 72.7, 59.6, 57.1, 53.0, 45.1, 44.8, 43.9, 38.0, 37.6, 36.0, 29.4, 25.9, 25.6, 25.1, 24.3, 23.8, 22.2, 22.1, 21.5, 21.3, 17.6, 15.6; HRMS (ESI+) calculated for  $[\text{C}_{37}\text{H}_{53}\text{BrO}_3 - \text{H}]^+$ : 623.3100, Found: 623.3139.

### **Compound 2l**

The compound **2l** was prepared according to the general procedure described above by the reaction between malabaricol **1** with phthalaldehyde and purified by column chromatography (9/91, EtOAc/hexane) as a light green viscous liquid. Yield 109.3mg (49.4%); IR (Neat)  $\nu_{max}$



2968, 2879, 1678, 1452, 1025, 908, 668  $\text{cm}^{-1}$ ;  $^1\text{H}$  NMR (400 MHz,  $\text{CDCl}_3$ ):  $\delta$  = 7.54 (d,  $J$  = 1.0 Hz, 1H), 7.48 (s, 2H), 5.12 (t,  $J$  = 7.0 Hz, 1H), 3.71 (t,  $J$  = 6.7 Hz, 1H), 2.95 (d,  $J$  = 16.4 Hz, 1H), 2.34 (d,  $J$  = 16.4 Hz, 1H), 2.16-1.31 (m, 20H), 1.69 (s, 3H), 1.62 (s, 3H), 1.26 (s, 3H), 1.21 (s, 3H), 1.18 (s, 3H), 1.15 (s, 3H), 0.97 (s, 3H), 0.82 (s, 3H).  $^{13}\text{C}$  NMR (100 MHz,  $\text{CDCl}_3$ ):  $\delta$  = 207.4, 136.7, 135.9, 134.4, 131.3, 130.3, 124.5, 85.5, 82.0, 72.6, 57.0, 52.9, 45.0, 44.9, 43.8, 38.0, 37.6, 36.2, 35.9, 29.5, 25.9, 25.6, 25.1, 24.2, 22.2, 22.1, 21.5, 21.3, 17.5, 15.6. HRMS (ESI+) calculated for  $[\text{C}_{68}\text{H}_{102}\text{O}_6 + \text{Na}]^+$ : 1037.7569 Found: 1037.7578.

### ***Compound 2m***

The compound **2m** was prepared according to the general procedure described above by the reaction between malabaricol **1** with 3-pyridinebenzaldehyde and purified by column chromatography (9/91, EtOAc/hexane) as a light green viscous liquid. Yield 79.8 mg (67%); IR (Neat)  $\nu_{\text{max}}$  2965, 2875, 1678, 1454, 1021, 906, 665  $\text{cm}^{-1}$ ;  $^1\text{H}$  NMR (500 MHz,  $\text{CDCl}_3$ ):  $\delta$  = 8.69 (d,  $J$  = 1.6 Hz, 1H), 8.55 (dd,  $J$  = 4.8, 1.5 Hz, 1H), 7.73 (m, 1H), 7.47 (s, 1H), 7.38-7.33 (m, 1H), 5.11 (t,  $J$  = 7.0 Hz, 1H), 3.71 (t,  $J$  = 6.8 Hz, 1H), 2.87 (d,  $J$  = 16.3 Hz, 1H), 2.40-2.27 (m, 1H), 2.15-1.30 (m, 25H), 1.24 (s, 3H), 1.21 (s, 3H), 1.18 (s, 3H), 1.16 (s, 3H), 0.96 (s, 3H), 0.82 (s, 3H);  $^{13}\text{C}$  NMR (100 MHz,  $\text{CDCl}_3$ ):  $\delta$  = 207.7, 137.6, 135.9, 133.8, 131.5, 130.3, 128.4, 128.3, 124.5, 85.6, 82.1, 72.7, 59.9, 57.2, 53.1, 45.1, 44.9, 43.9, 38.1, 37.6, 36.4, 36.0, 29.6, 29.5, 26.0, 25.6, 25.1, 24.3, 23.8, 22.3, 22.2, 21.5, 21.4, 17.6, 15.6; HRMS (ESI+) calculated for  $[\text{C}_{36}\text{H}_{53}\text{NO}_3 + \text{H}]^+$ : 548.4098, Found: 548.4110.

### ***Compound 2n***

The compound **2n** was prepared according to the general procedure described above by the reaction between malabaricol **1** with 2-pyridinecarboxaldehyde and purified by column chromatography (9/91, EtOAc/hexane) as a light green viscous liquid. Yield 82.7 mg (69.3%);

IR (Neat)  $\nu_{max}$  2958, 2852, 1679, 1457, 1076, 906, 665  $\text{cm}^{-1}$ ;  $^1\text{H}$  NMR (500 MHz,  $\text{CDCl}_3$ ):  $\delta$  = 8.69 (dd,  $J$  = 4.7, 0.9 Hz, 1H), 7.69 (td,  $J$  = 7.7, 1.8 Hz, 1H), 7.42 (dd,  $J$  = 2.7, 1.5 Hz, 1H), 7.38 (d,  $J$  = 7.9, Hz 1H), 7.18 (dddd,  $J$  = 12.3, 7.4, 4.8, 0.7 Hz, 1H), 5.11 (t,  $J$  = 7.0 Hz, 1H), 3.70 (t,  $J$  = 6.8 Hz, 1H), 3.41 (d,  $J$  = 17.3 Hz, 1H), 2.48 (d,  $J$  = 17.3, Hz, 1H), 2.14-1.97 (m, 3H), 1.79-1.31 (m, 22H), 1.24 (s, 3H), 1.20 (s, 3H), 1.18 (s, 3H), 1.14 (s, 3H), 0.96 (s, 3H), 0.83 (s, 3H);  $^{13}\text{C}$  NMR (100 MHz,  $\text{CDCl}_3$ ):  $\delta$  = 208.5, 155.5, 149.4, 138.2, 136.0, 134.5, 131.4, 126.6, 124.5, 122.2, 85.6, 82.0, 72.7, 59.9, 56.8, 53.0, 45.2, 43.8, 38.0, 37.5, 36.2, 35.8, 29.6, 29.4, 26.0, 25.6, 25.1, 24.3, 23.8, 22.1, 21.5, 21.3, 17.6, 15.8; HRMS (ESI+) calculated for  $[\text{C}_{36}\text{H}_{53}\text{NO}_3 + \text{H}]^+$ : 548.4098, Found: 548.4111.

### ***Compound 2o***

The compound **2o** was prepared according to the general procedure described above by the reaction between malabaricol **1** with furan-2-carbaldehyde and purified by column chromatography (9/91, EtOAc/hexane) as a light green viscous liquid. Yield 78.0 mg (66.7%); IR (Neat)  $\nu_{max}$  2959, 2872, 1671, 1455, 1074, 907, 666  $\text{cm}^{-1}$ ;  $^1\text{H}$  NMR (400 MHz,  $\text{CDCl}_3$ ):  $\delta$  = 7.55 (d,  $J$  = 1.5 Hz, 1H), 7.34 - 7.31 (m, 1H), 6.59 (d,  $J$  = 3.4 Hz, 1H), 6.50 (dd,  $J$  = 3.3, 1.7 Hz, 1H), 5.12 (t,  $J$  = 7.0 Hz, 1H), 3.70 (t,  $J$  = 7.2 Hz, 1H), 3.02 (d,  $J$  = 17.3 Hz, 1H), 2.27 (d,  $J$  = 17.4 Hz, 1H), 2.18-1.89 (m, 2H), 1.89-1.32 (m, 17H), 1.68 (d,  $J$  = 0.6 Hz, 1H), 1.62 (s, 3H), 1.26 (s, 3H), 1.25 (s, 3H), 1.21 (s, 3H), 1.17 (s, 3H), 1.10 (s, 3H), 0.98 (s, 3H), 0.85 (s, 3H);  $^{13}\text{C}$  NMR (100 MHz,  $\text{CDCl}_3$ ):  $\delta$  = 207.2, 152.5, 144.3, 131.5, 130.9, 124.5, 124.3, 115.3, 112.1, 85.6, 82.1, 72.7, 57.1, 52.8, 45.1, 44.8, 43.9, 38.1, 37.6, 35.5, 29.7, 29.6, 25.6, 25.0, 24.3, 22.2, 22.1, 21.6, 21.4, 17.6, 16.0; HRMS (ESI+) calculated for  $[\text{C}_{35}\text{H}_{52}\text{O}_4 + \text{H}]^+$ : 537.3938, Found: 537.3930.

### ***Compound 3***

To a stirred solution of malabaricol **1** (100 mg, 218  $\mu\text{mol}$ ) and ethylformate (88  $\mu\text{L}$ , 1.09 mmol) in THF at 0° C was added potassium *tert*-butoxide (98 mg, 872 mmol) and stirring was continued for 4 h. The reaction mixture was quenched with saturated  $\text{NH}_4\text{Cl}$  (5 mL) at 0° C followed by concentration of solvent. The reaction mixture was extracted with ethyl acetate (3 x 30 mL), washed with brine, dried over  $\text{Na}_2\text{SO}_4$  and concentrated. The obtained residue was purified by column chromatography (12/88, EtOAc/hexane) to give **3** (75.5 mg, 71.2%) as a light greenish viscous liquid. (IR (Neat)  $\nu_{\text{max}}$  2965, 2873, 1711, 1453, 1029, 905, 666  $\text{cm}^{-1}$ ;  $^1\text{H}$  NMR (500 MHz,  $\text{CDCl}_3$ ):  $\delta$  = 14.9 (d,  $J$  = 3.2 Hz, 1H), 8.56 (d,  $J$  = 2.8, Hz, 1H), 5.11 (t,  $J$  = 7.0 Hz, 1H), 3.69 (t,  $J$  = 7.0 Hz, 1H), 2.21 (d,  $J$  = 14.3, Hz, 1H), 2.15-1.24 (m, 29H), 1.20 (s, 6H), 1.11 (s, 3H), 0.96 (s, 3H), 0.85 (s, 3H);  $^{13}\text{C}$  NMR (100 MHz,  $\text{CDCl}_3$ ): 191.0, 188.1, 131.5, 124.5, 105.8, 85.6, 82.2, 72.7, 59.4, 57.1, 52.4, 44.0, 40.0, 38.1, 37.6, 36.5, 36.0, 28.4, 25.9, 25.6, 25.3, 24.3, 23.9, 22.1, 21.1, 20.5, 17.6, 15.0; HRMS (ESI+) calculated for  $[\text{C}_{31}\text{H}_{50}\text{O}_4 + \text{H}]^+$ : 487.3782, Found: 487.3770.

#### **Compound 4**

To a stirred solution of malabaricol **1** (100 mg, 218  $\mu\text{mol}$ ) and hydroxylamine hydrochloride (75.8 mg, 1.09 mmol) in ethanol at room temperature was added acetic acid (100  $\mu\text{L}$ ), the reaction mixture was refluxed for 4 h. The reaction mixture was concentrated, extracted with ethyl acetate (3 x 30 mL), washed with brine, dried over  $\text{Na}_2\text{SO}_4$  and concentrated. The obtained residue was purified by column chromatography (1/9, EtOAc/hexane) to give **4** (47.9 mg, 46.4%) as a light greenish viscous liquid. IR (Neat)  $\nu_{\text{max}}$  2964, 2873, 1452, 1072, 930, 665  $\text{cm}^{-1}$ ;  $^1\text{H}$  NMR (400 MHz,  $\text{CDCl}_3$ ):  $\delta$  = 9.19 -8.81 (brs, 1H), 5.11 (t,  $J$  = 7.0 Hz, 1H), 3.67 (t,  $J$  = 6.9 Hz, 1H), 3.12-3.02 (m, 1H), 2.27-2.16 (m, 1H), 2.15-1.24 (m, 21H), 1.68 (d,  $J$  = 0.7 Hz, 3H), 1.61 (s, 3H), 1.18 (s, 3H), 1.18 (s, 3H), 1.16 (s, 3H), 1.06 (s, 3H), 0.95 (s, 6H);  $^{13}\text{C}$  NMR (100

MHz, CDCl<sub>3</sub>):  $\delta$  = 166.7, 131.4, 124.6, 85.6, 82.1, 72.7, 58.4, 56.1, 44.0, 40.2, 39.0, 38.1, 37.5, 36.9, 36.8, 27.3, 26.0, 25.9, 25.6, 24.3, 23.8, 22.9, 22.1, 21.0, 20.0, 17.5, 17.0, 15.4; HRMS (ESI+) calculated for [C<sub>30</sub>H<sub>51</sub>NO<sub>3</sub> + H]<sup>+</sup>: 474.3942, Found: 474.3952.

### **Compound 5**

To a stirred solution of malabaricol **1** (100 mg, 218  $\mu$ mol) and 2,4- dinitrophenylhydrazine (130 mg, 654  $\mu$ mol) in ethanol at room temperature was added acetic acid (100  $\mu$ L), the reaction mixture was refluxed for 4 h. The reaction mixture was concentrated, extracted with ethyl acetate (3 x 30 mL), washed with brine, dried over Na<sub>2</sub>SO<sub>4</sub> and concentrated. The obtained residue was purified by column chromatography (1/9, EtOAc/hexane) to give **5** (93.6 mg, 67.2%) as an orange red solid. M.Pt. 109-111 °C IR (Neat)  $\nu_{max}$  2966, 2872, 1451, 1071, 921, 666 cm<sup>-1</sup>; <sup>1</sup>H NMR (500 MHz, CDCl<sub>3</sub>):  $\delta$  = 11.7 (s, 1H), 9.12 (d,  $J$  = 2.5 Hz, 1H), 8.29 (dd,  $J$  = 2.4, 9.4 Hz, 1H), 7.95 (d,  $J$  = 9.6 Hz, 1H), 5.10 (t,  $J$  = 7.0 Hz, 1H), 3.68 (t,  $J$  = 6.8 Hz, 1H), 2.64 (d,  $J$  = 15.5 Hz, 1H), 2.55-2.44 (m, 1H), 2.15-1.96 (m, 3H), 1.96-1.24 (m, 18H), 1.68 (s, 3H), 1.61 (s, 3H), 1.31 (s, 3H), 1.20 (s, 3H), 1.19 (s, 3H), 1.17 (s, 3H), 0.98 (s, 3H), 0.96 (s, 3H); <sup>13</sup>C NMR (100 MHz, CDCl<sub>3</sub>):  $\delta$  = 166.8, 145.5, 137.4, 131.5, 128.9, 124.5, 123.5, 116.4, 85.5, 82.2, 72.7, 58.2, 55.7, 44.1, 42.1, 38.6, 38.1, 37.5, 36.5, 28.8, 25.7, 25.6, 24.3, 23.8, 22.1, 21.0, 20.6, 20.5, 17.5, 15.2; HRMS (ESI+) calculated for [C<sub>36</sub>H<sub>54</sub>N<sub>4</sub>O<sub>6</sub> + H]<sup>+</sup>: 639.4116, Found: 639.4103.

### **Compound 6a**

To a stirred solution of malabaricol **1** (100 mg, 218  $\mu$ mol) and phenylhydrazine hydrochloride (95 mg, 654  $\mu$ mol) in ethanol at room temperature was added acetic acid (100  $\mu$ L), the reaction mixture was refluxed for 4h. The reaction mixture was concentrated, extracted with ethyl acetate (3 x 30 mL), washed with brine, dried over Na<sub>2</sub>SO<sub>4</sub> and concentrated. The obtained residue was purified by column chromatography (1/9, EtOAc/hexane) to give indole **6a** (70.9 mg, 61.2%) as

a light greenish viscous liquid. IR (Neat)  $\nu_{max}$  2963, 2876, 1459, 1074, 901, 666  $\text{cm}^{-1}$ ;  $^1\text{H}$  NMR (400 MHz,  $\text{CDCl}_3$ ):  $\delta$  = 7.75 (s, 1H), 7.43 (d,  $J$  = 7.6 Hz, 1H), 7.29 (d,  $J$  = 7.6 Hz, 1H), 7.11 (td,  $J$  = 1.2, 7.1 Hz, 1H), 7.05 (td,  $J$  = 1.2, 7.7 Hz, 1H), 5.11 (t,  $J$  = 7.0 Hz, 1H), 3.70 (t,  $J$  = 6.8 Hz, 1H), 2.69 (d,  $J$  = 15.1 Hz, 1H), 2.25 (d,  $J$  = 15.1 Hz, 1H), 2.15-1.22 (m, 20H), 1.68 (s, 3H), 1.61 (s, 3H), 1.31 (s, 3H), 1.24 (s, 3H), 1.22 (s, 3H), 1.20 (s, 3H), 1.00 (s, 3H), 0.88 (s, 3H);  $^{13}\text{C}$  NMR (100 MHz,  $\text{CDCl}_3$ ):  $\delta$  = 141.0, 136.0, 131.4, 128.2, 124.6, 120.9, 118.8, 118.0, 110.2, 107.0, 85.8, 82.1, 72.8, 57.8, 53.6, 44.2, 38.1, 37.7, 37.5, 33.9, 31.0, 26.9, 25.6, 25.4, 24.3, 22.9, 22.6, 22.2, 21.3, 20.3, 17.6, 16.2, 14.1; HRMS (ESI+) calculated for  $[\text{C}_{36}\text{H}_{53}\text{NO}_2 + \text{H}]^+$ : 532.4149, Found: 532.4156.

### **Compound 6b**

The compound **6b** was prepared according to the procedure **6a** described above by the reaction between malabaricol **1** with 4-bromophenylhydrazine hydrochloride and purified by column chromatography (9/91, EtOAc/hexane) as a light green viscous liquid. Yield 84.7 mg (63.7%); IR (Neat)  $\nu_{max}$  2962, 2876, 1458, 1076, 901, 665  $\text{cm}^{-1}$ ;  $^1\text{H}$  NMR (400 MHz,  $\text{CDCl}_3$ ):  $\delta$  = 7.79 (s, 1H), 7.55 (d,  $J$  = 1.5 Hz, 1H), 7.20-7.13 (m, 2H), 5.11 (t,  $J$  = 6.9 Hz, 1H), 3.70 (t,  $J$  = 6.8 Hz, 1H), 2.63 (d,  $J$  = 14.9 Hz, 1H), 2.21 (d,  $J$  = 14.9 Hz, 1H), 2.25-1.16 (m, 19H), 1.68 (s, 3H), 1.61 (s, 3H), 1.30 (s, 3H), 1.25 (s, 3H), 1.21 (s, 3H), 1.20 (s, 3H), 0.99 (s, 3H), 0.86 (s, 3H);  $^{13}\text{C}$  NMR (100 MHz,  $\text{CDCl}_3$ ):  $\delta$  = 142.9, 134.5, 131.5, 130.0, 124.5, 123.5, 120.7, 112.0, 111.6, 106.9, 85.7, 82.0, 72.7, 57.6, 53.5, 44.1, 38.1, 37.7, 37.5, 37.3, 34.0, 31.9, 30.9, 29.6, 25.6, 25.4, 24.3, 22.9, 22.6, 22.1, 21.2, 20.2, 17.6, 16.1; HRMS (ESI+) calculated for  $[\text{C}_{36}\text{H}_{52}\text{BrNO}_2 + \text{H}]^+$ : 610.3254, Found: 610.3258.

### **Compound 7**

To a stirred solution of malabaricol **1** (100 mg, 218  $\mu\text{mol}$ ) ethylenediamine (78  $\mu\text{L}$ , 1.09 mmol) in morpholine at room temperature sulphur (41.8 mg, 1.3mmol) was added and then the reaction mixture was refluxed for 4 h. The reaction mixture was concentrated, the obtained residue was directly purified by column chromatography (1/9, EtOAc/hexane) to give **7** (73.4 mg, 68.1%) as a light greenish viscous liquid. IR (Neat)  $\nu_{\text{max}}$  2962, 2874, 1452, 1075, 903 665  $\text{cm}^{-1}$ ;  $^1\text{H}$  NMR (400 MHz,  $\text{CDCl}_3$ ):  $\delta$  = 8.41 (dd,  $J$  = 0.7, 2.3 Hz, 1H), 8.27 (d,  $J$  = 2.5 Hz, 1H), 5.11 (t,  $J$  = 7.1 Hz, 1H), 3.71 (t,  $J$  = 7.1 Hz, 1H), 2.91 (d,  $J$  = 16.5 Hz, 1H), 2.57 (d,  $J$  = 16.5 Hz, 1H), 2.16-1.40 (m, 18H), 1.68 (s, 3H), 1.61 (s, 3H), 1.41-1.28 (m, 1H), 1.32 (s, 3H), 1.30 (s, 3H), 1.24 (s, 3H), 1.20 (s, 3H), 1.00 (s, 3H), 0.84 (s, 3H);  $^{13}\text{C}$  NMR (125 MHz,  $\text{CDCl}_3$ ):  $\delta$  = 159.8, 150.7, 142.2, 141.4, 131.4, 124.5, 85.6, 82.1, 72.7, 57.2, 53.4, 49.1, 44.0, 39.3, 38.1, 37.6, 36.5, 36.2, 31.6, 26.0, 25.6, 25.2, 24.2, 23.8, 22.1, 21.1, 17.5, 16.0; HRMS (ESI+) calculated for  $[\text{C}_{32}\text{H}_{50}\text{N}_2\text{O}_2 + \text{H}]^+$ : 495.3945, Found: 495.3932.

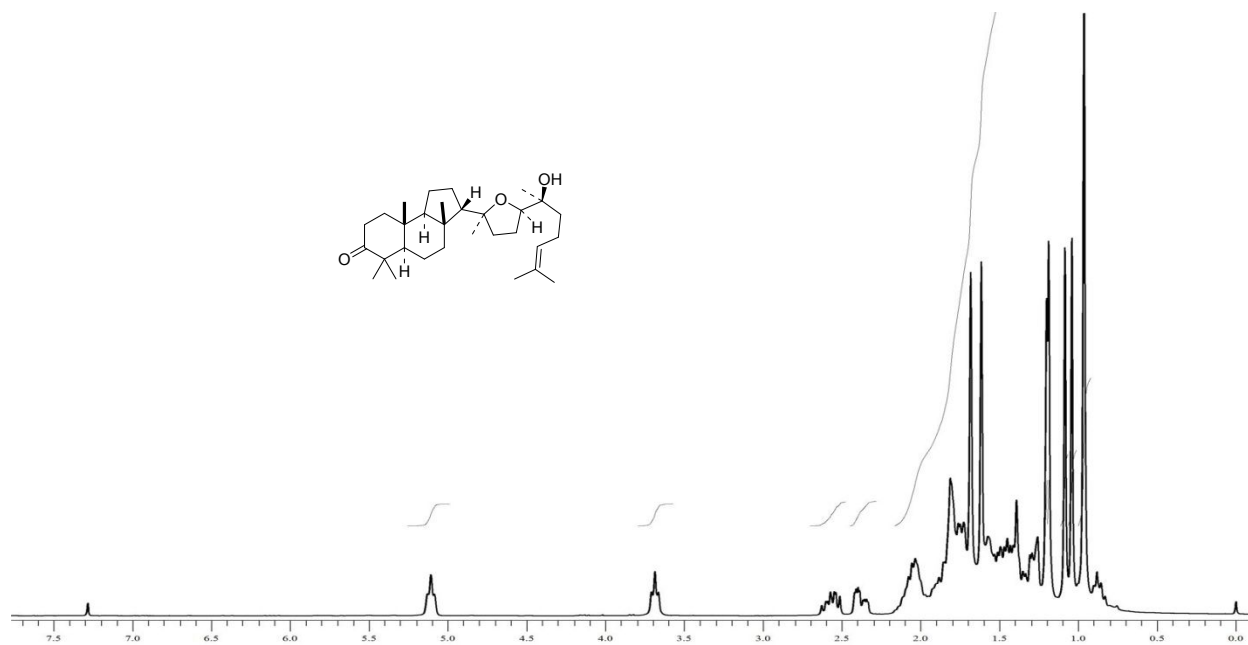

**<sup>1</sup>H NMR spectrum of compound 1 in CDCl<sub>3</sub>**

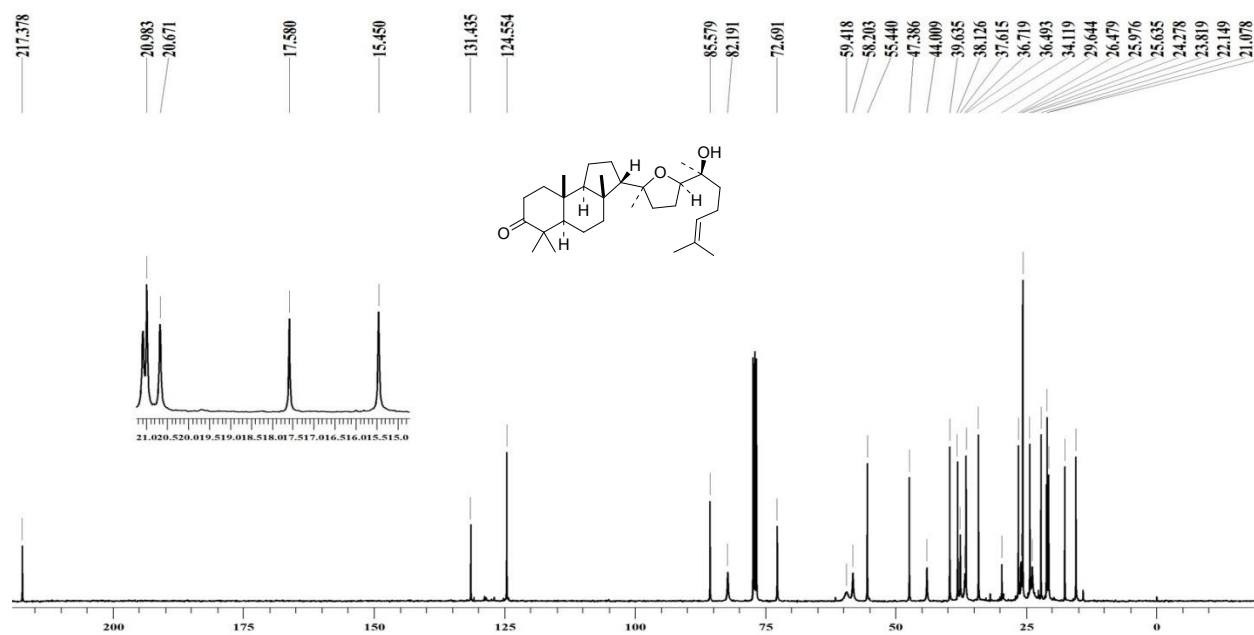

**<sup>13</sup>C NMR spectrum of compound 1 in CDCl<sub>3</sub>**

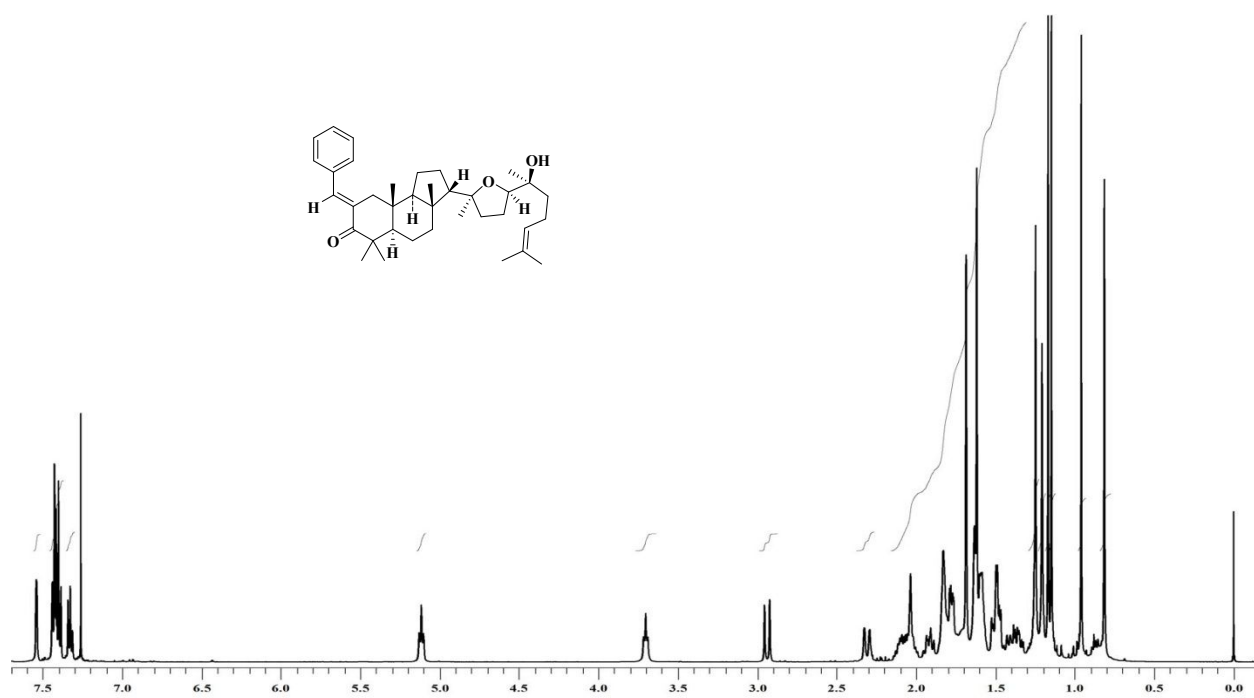

**<sup>1</sup>H NMR spectrum of compound 2a in CDCl<sub>3</sub>**



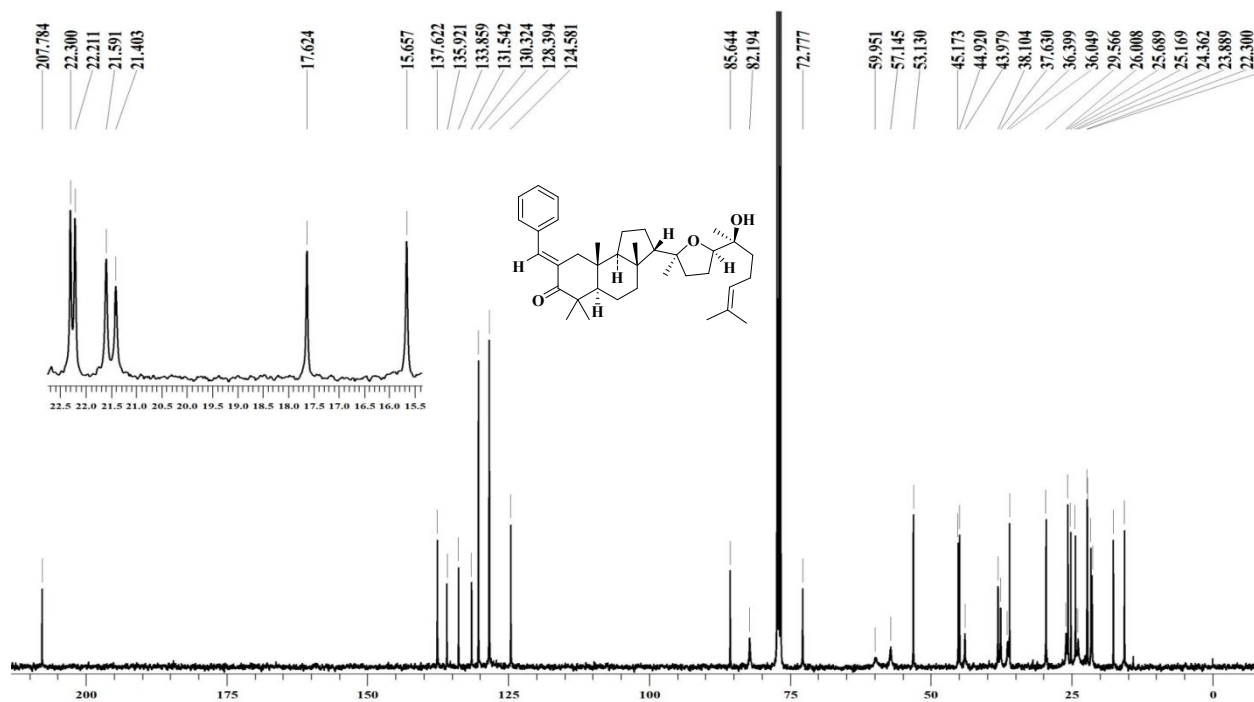

**<sup>13</sup>C NMR spectrum of compound 2a in CDCl<sub>3</sub>**

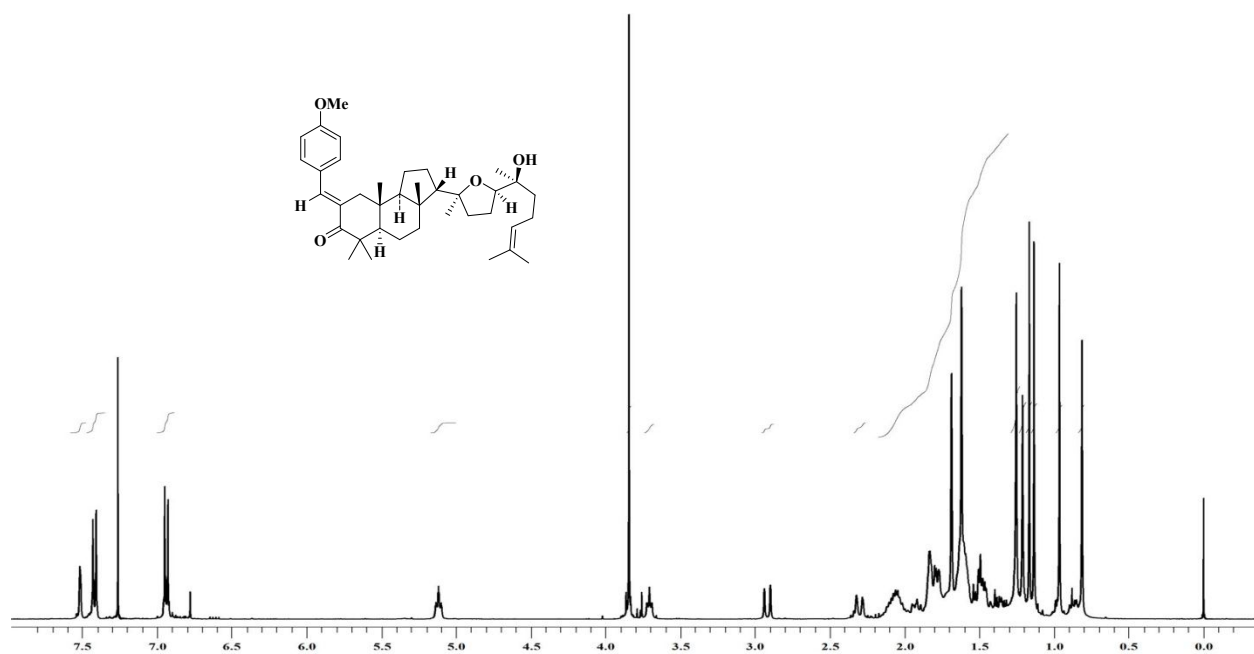

**<sup>1</sup>H NMR spectrum of compound 2b in CDCl<sub>3</sub>**

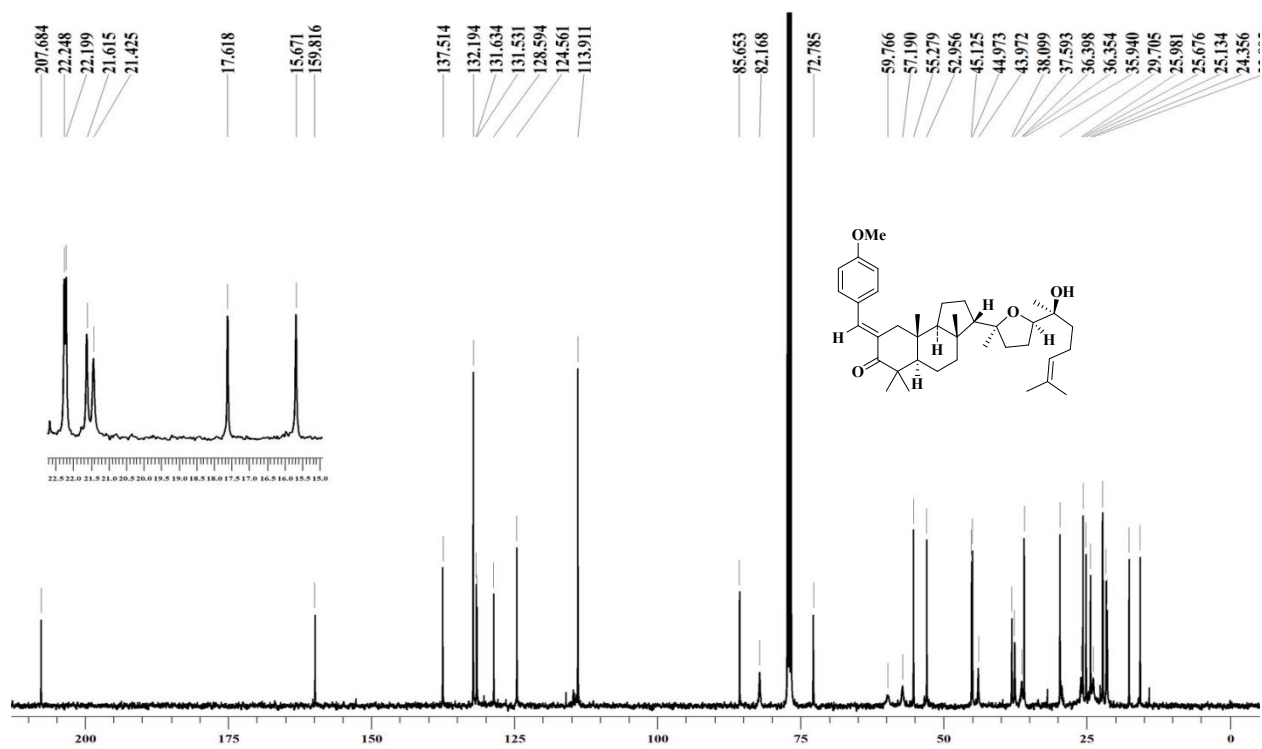

<sup>13</sup>C NMR spectrum of compound 2b in CDCl<sub>3</sub>

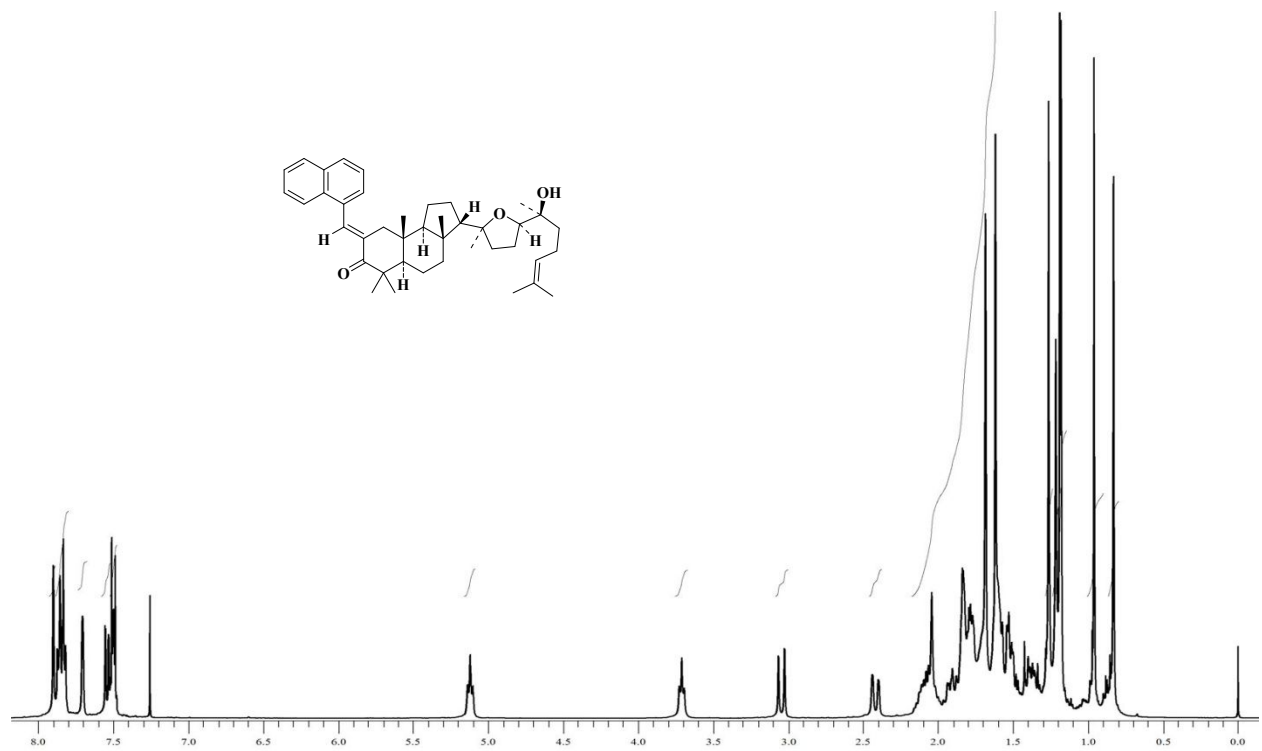

### <sup>1</sup>H NMR spectrum of compound 2c in CDCl<sub>3</sub>

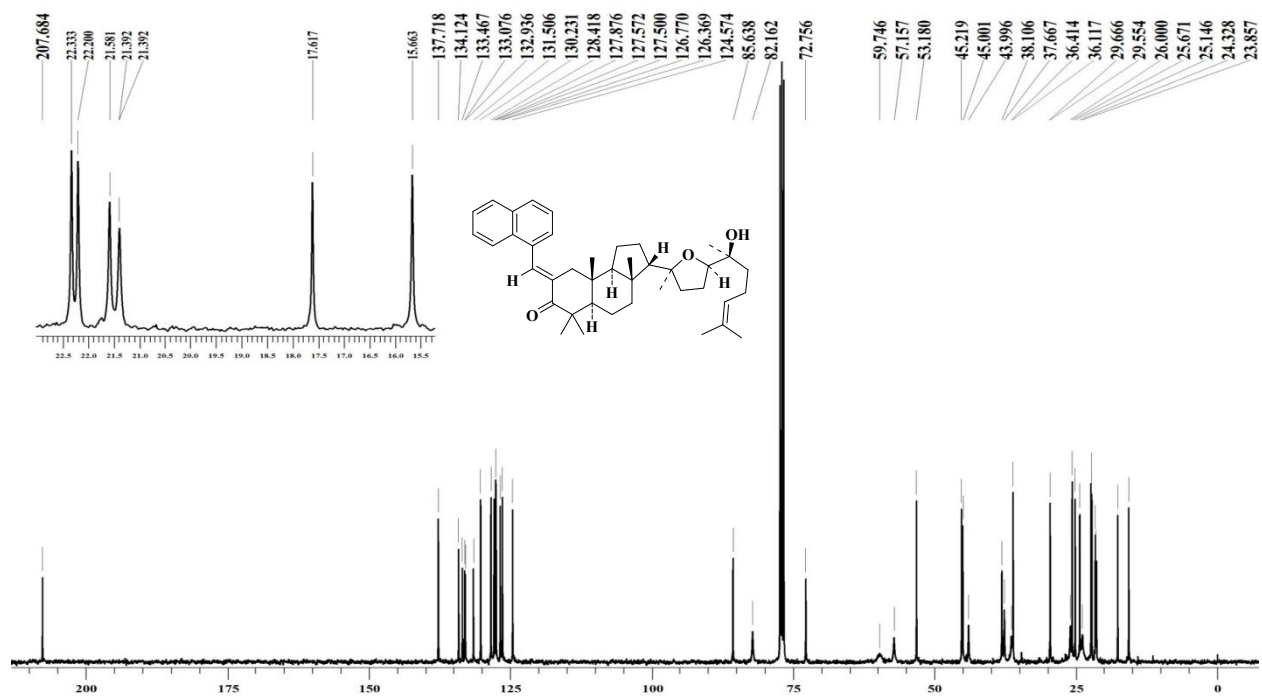

### <sup>13</sup>C NMR spectrum of compound 2c in CDCl<sub>3</sub>

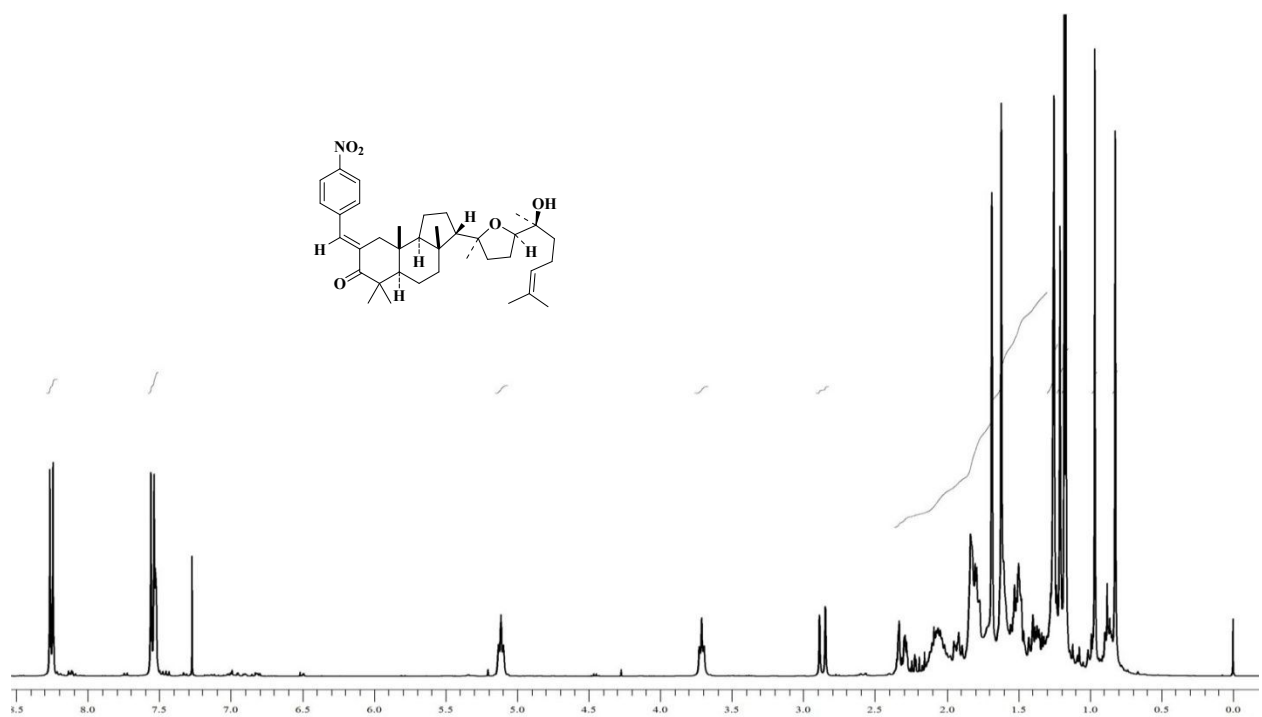

**$^1\text{H}$  NMR spectrum of compound 2d in  $\text{CDCl}_3$**

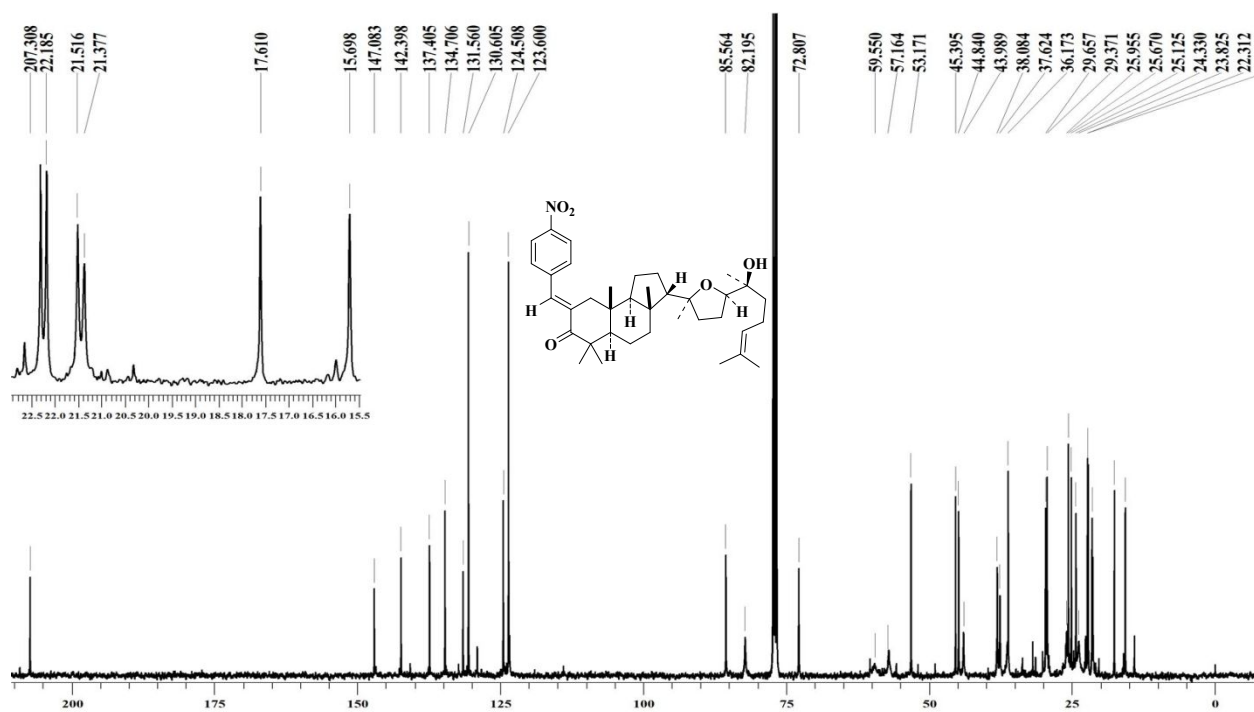

**$^{13}\text{C}$  NMR spectrum of compound 2d in  $\text{CDCl}_3$**

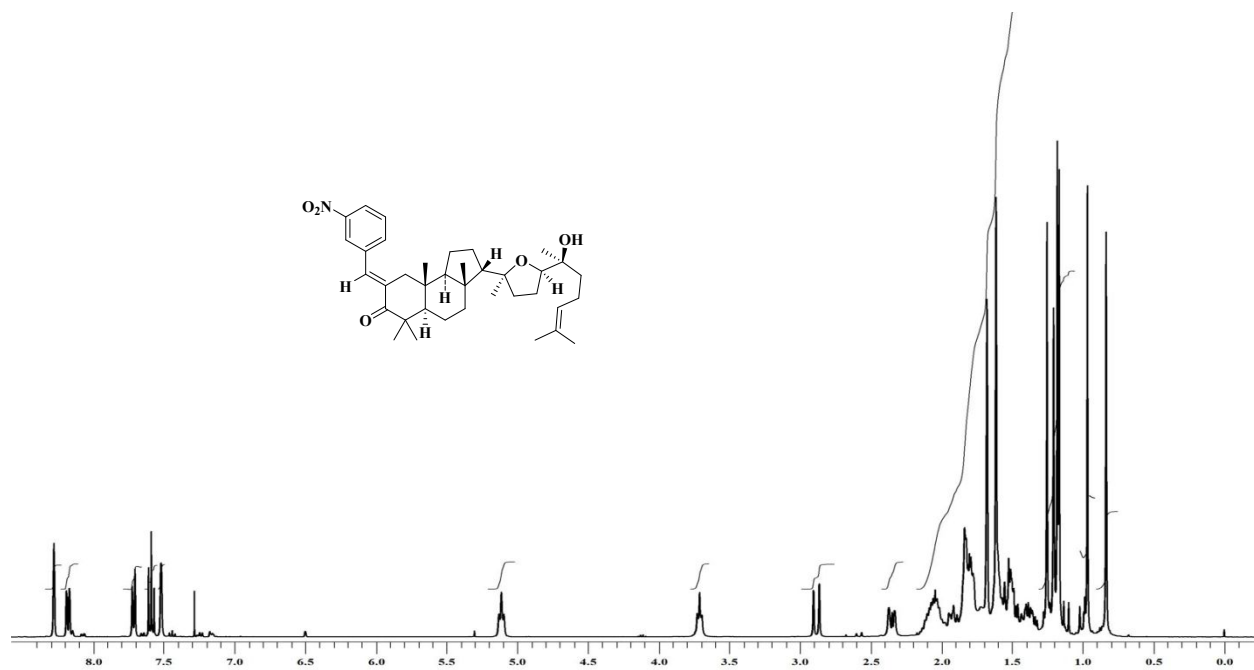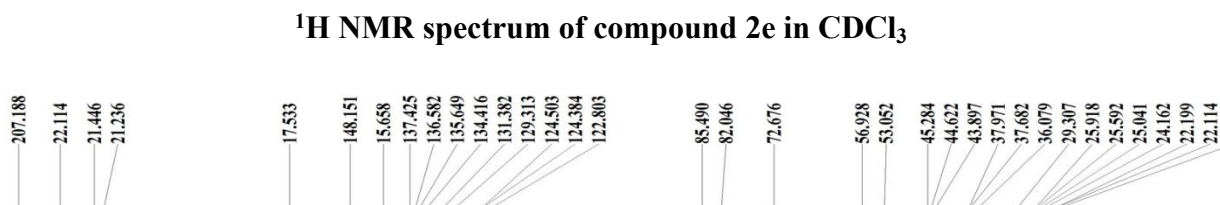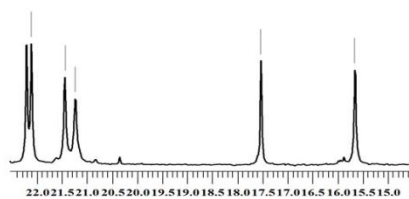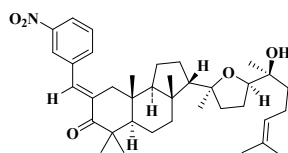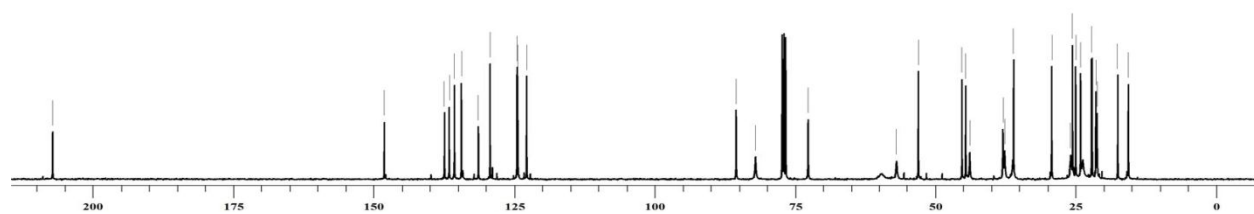

**<sup>13</sup>C NMR spectrum of compound 2e in CDCl<sub>3</sub>**

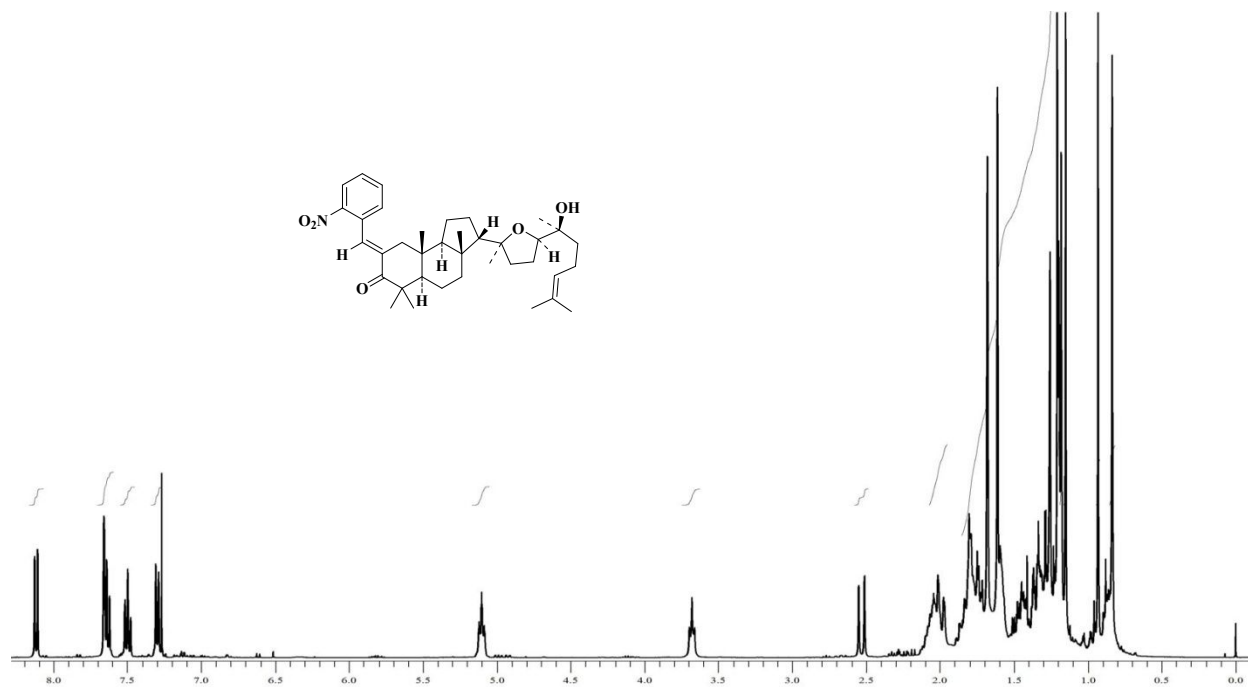

<sup>1</sup>H NMR spectrum of compound 2f in CDCl<sub>3</sub>

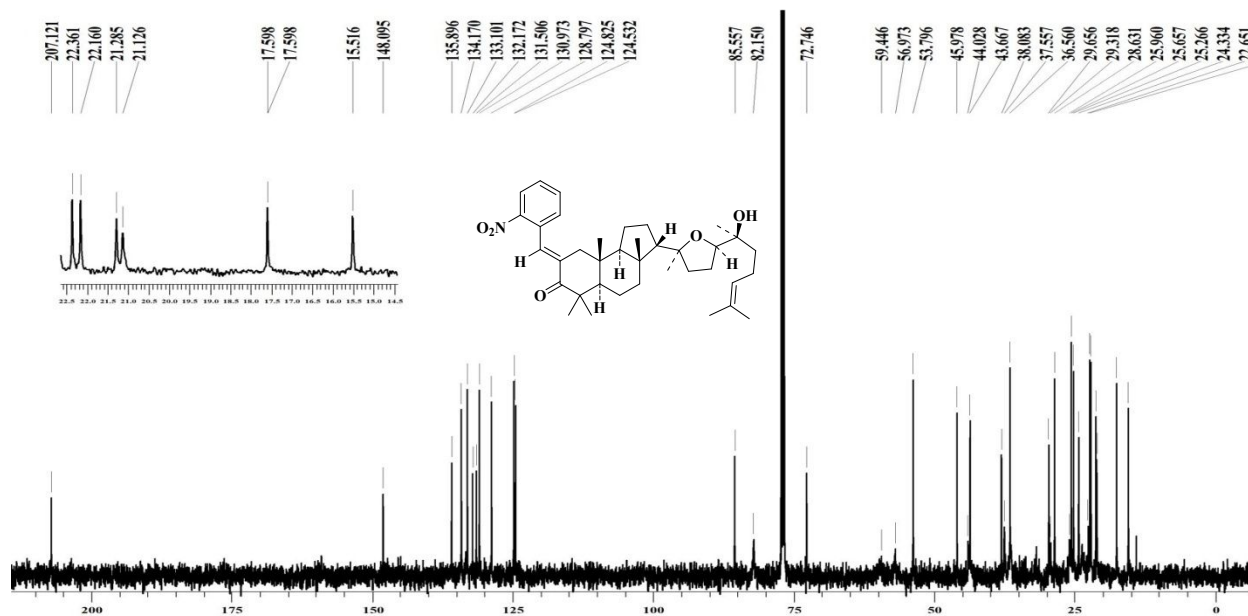

<sup>13</sup>C NMR spectrum of compound 2f in CDCl<sub>3</sub>

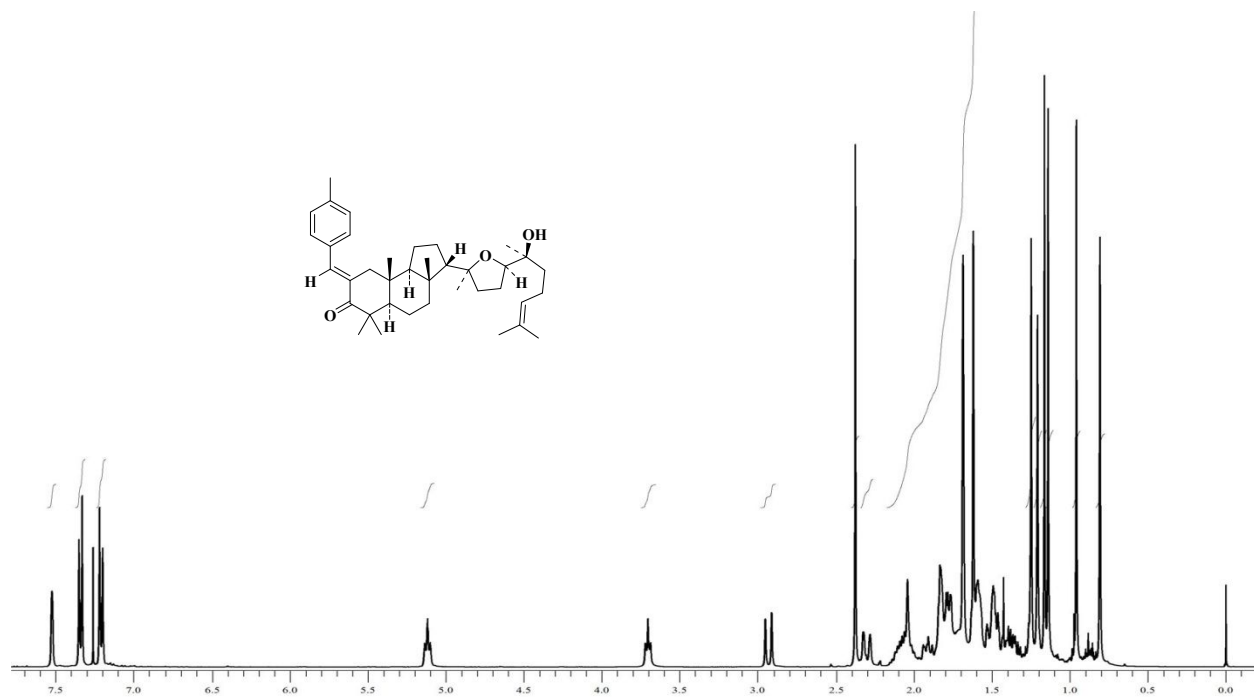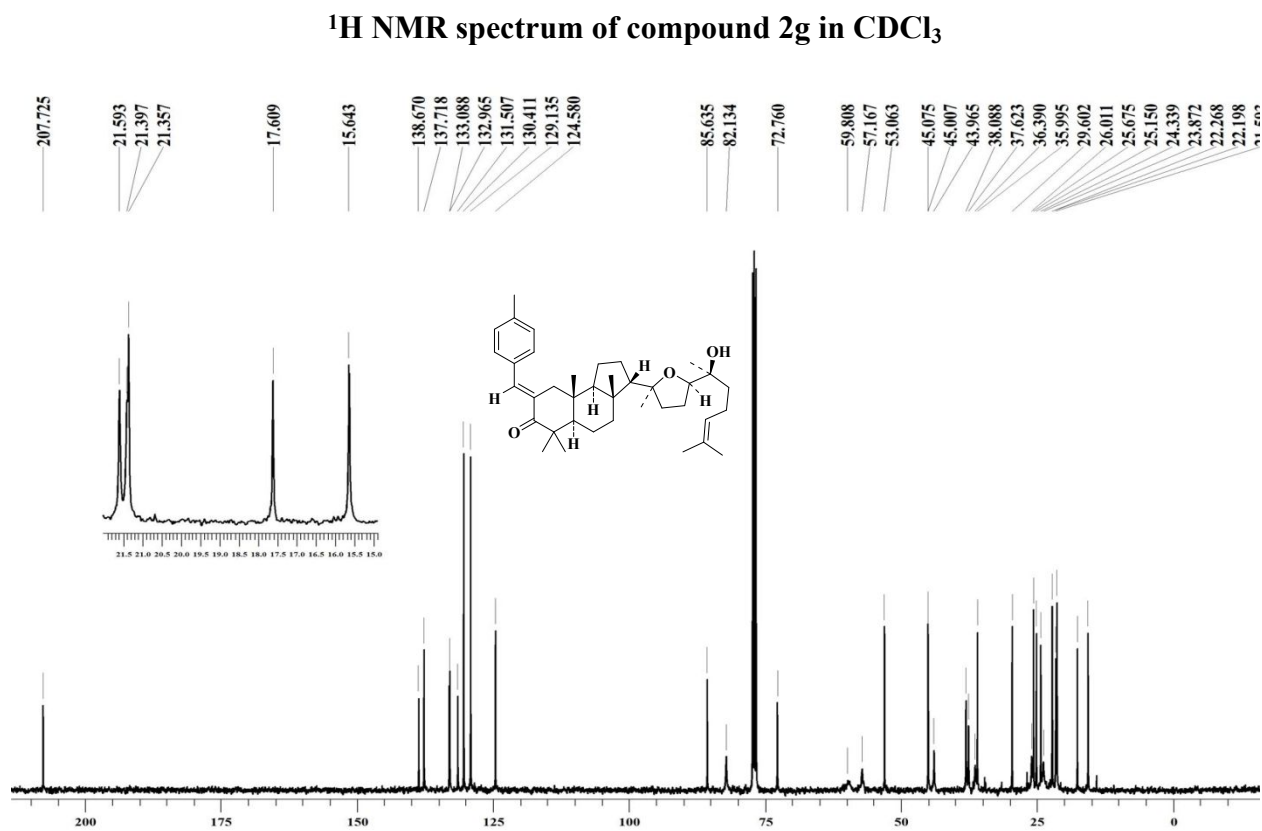

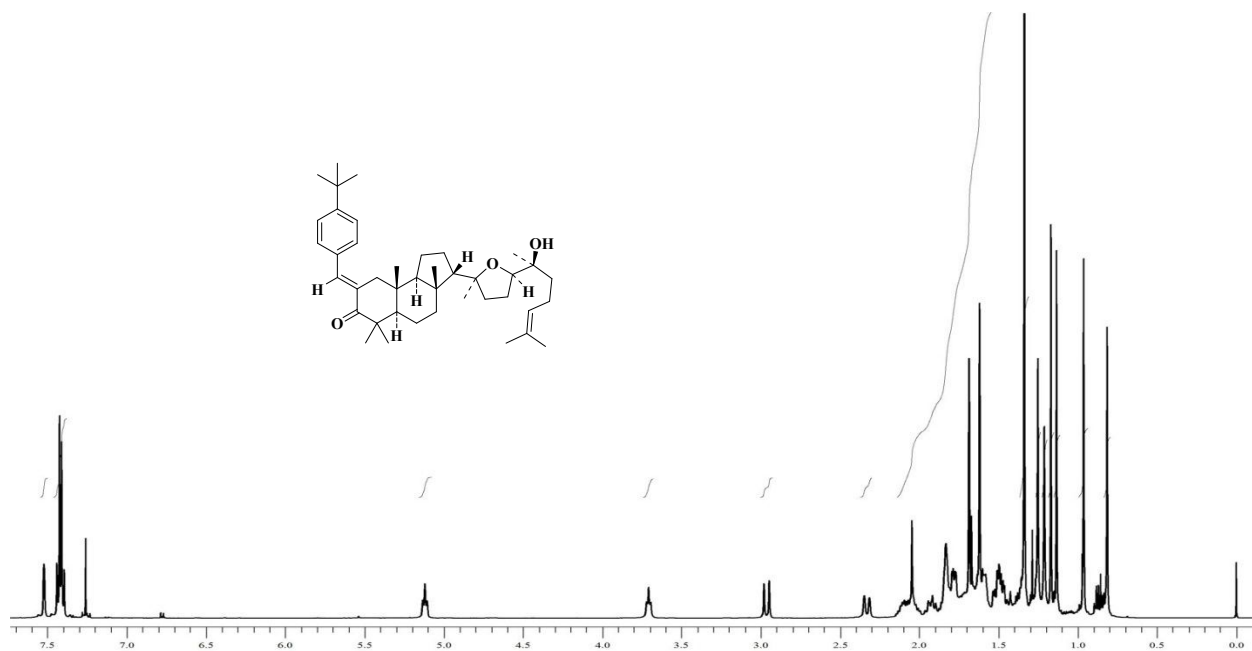

**<sup>1</sup>H NMR spectrum of compound 2h in CDCl<sub>3</sub>**

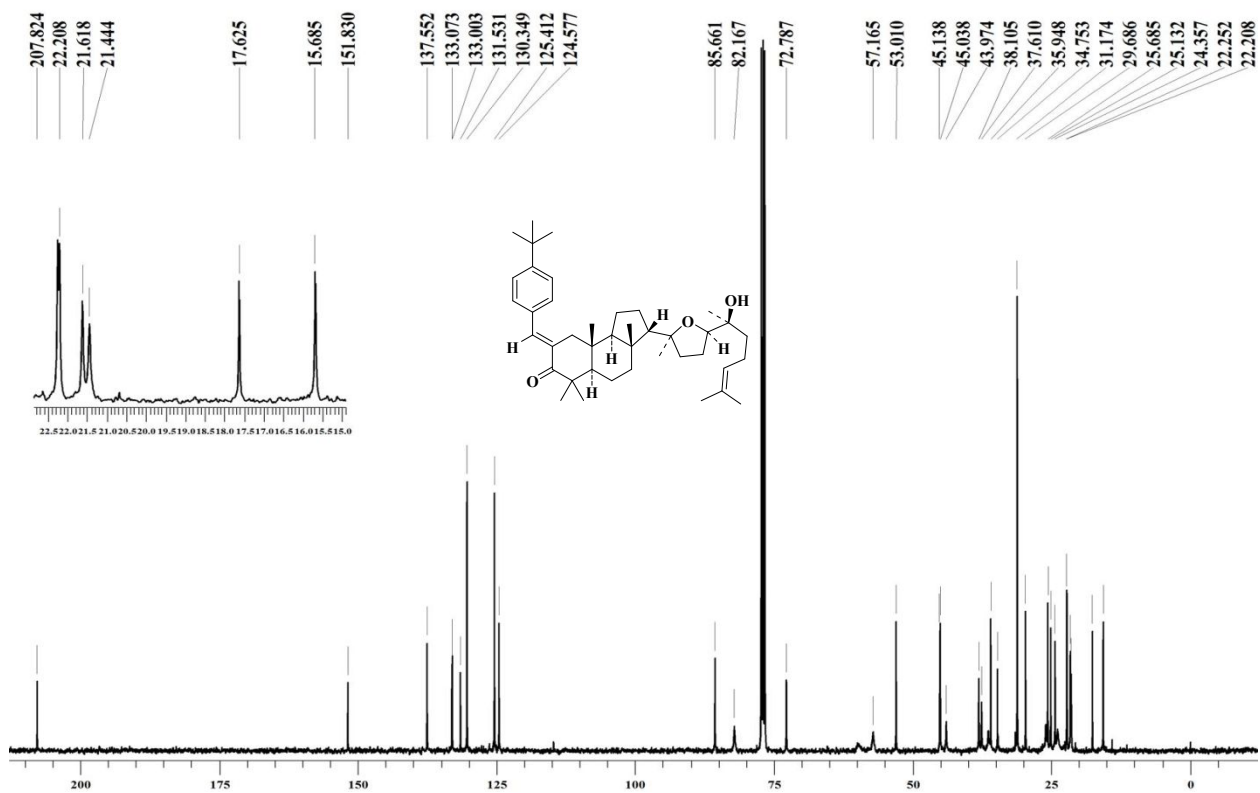

**<sup>13</sup>C NMR spectrum of compound 2h in CDCl<sub>3</sub>**



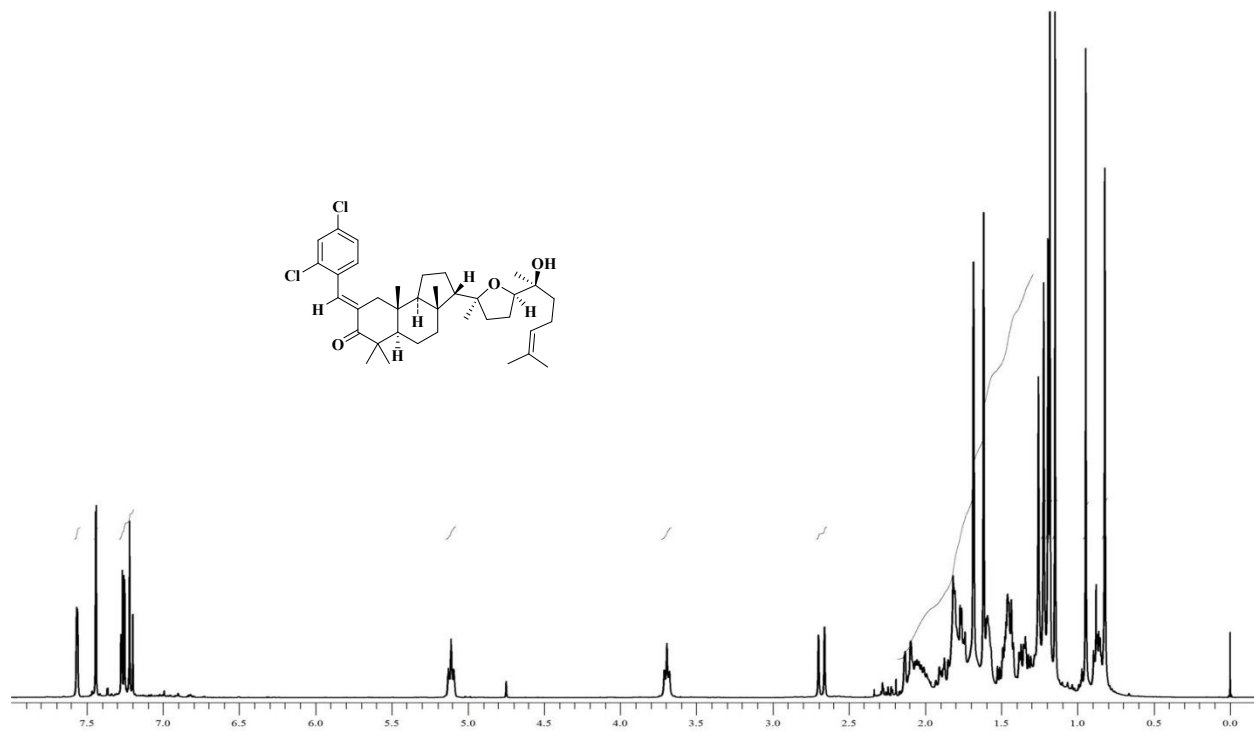

<sup>1</sup>H NMR spectrum of compound 2i in CDCl<sub>3</sub>

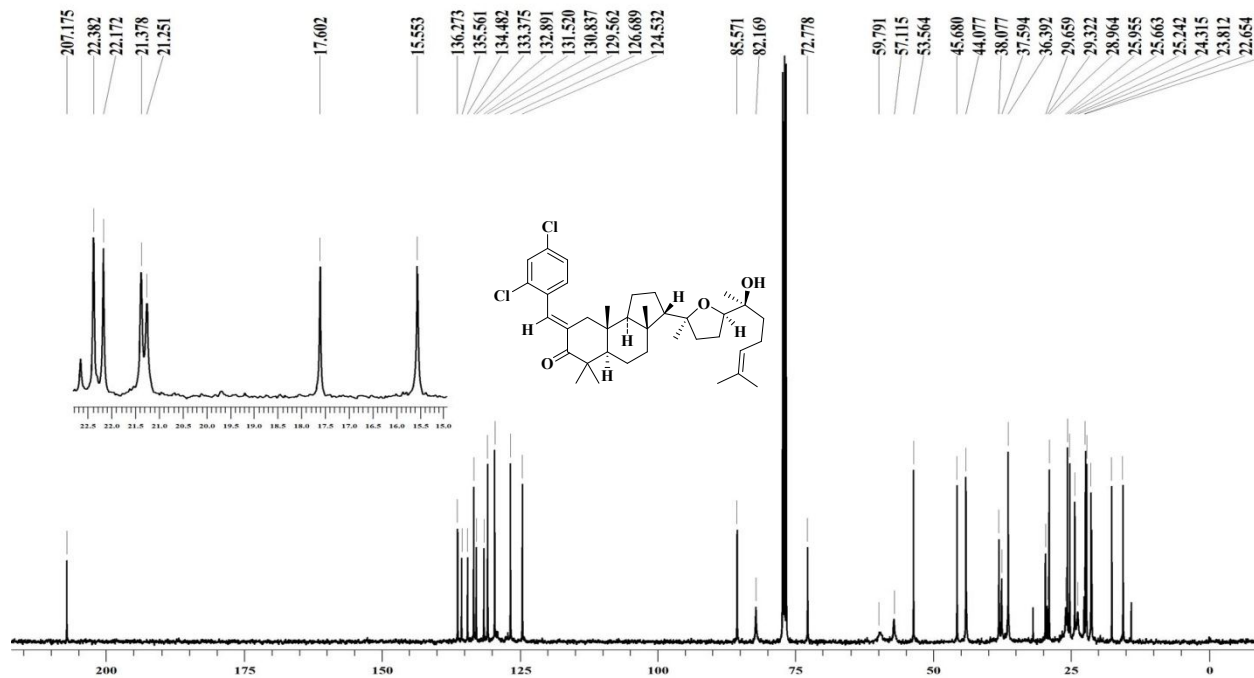

<sup>13</sup>C NMR spectrum of compound 2i in CDCl<sub>3</sub>

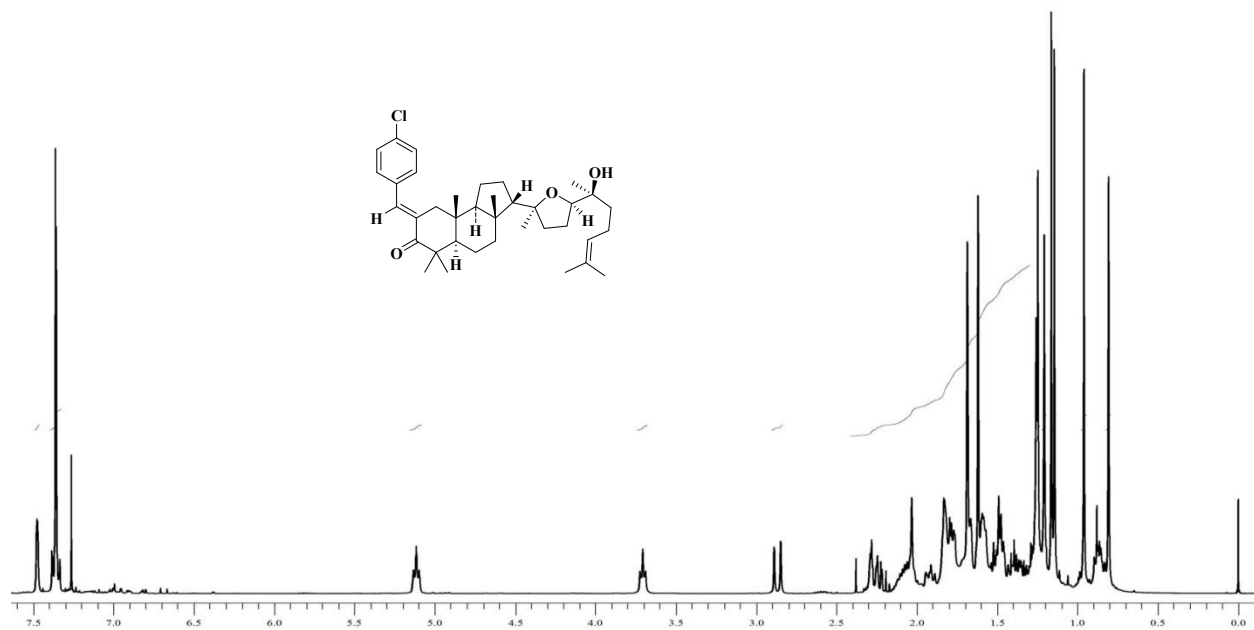

**<sup>1</sup>H NMR spectrum of compound 2j in CDCl<sub>3</sub>**

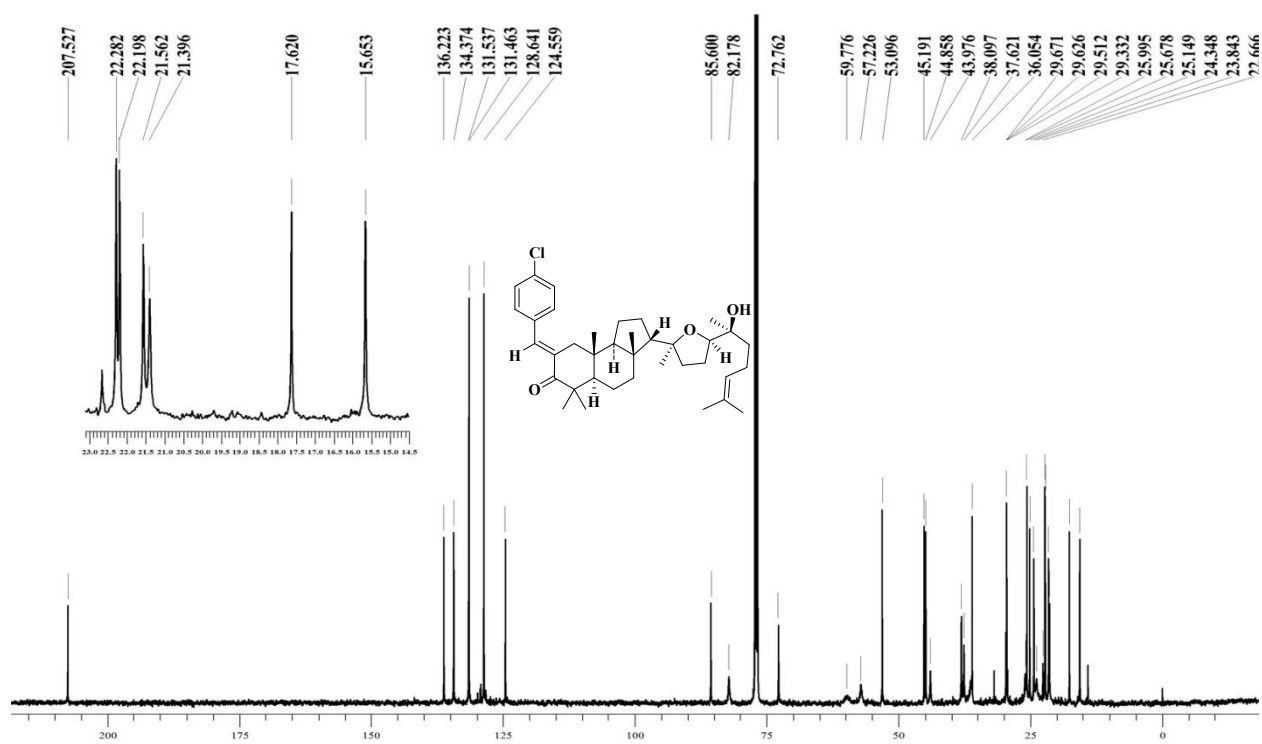

**<sup>13</sup>C NMR spectrum of compound 2j in CDCl<sub>3</sub>**

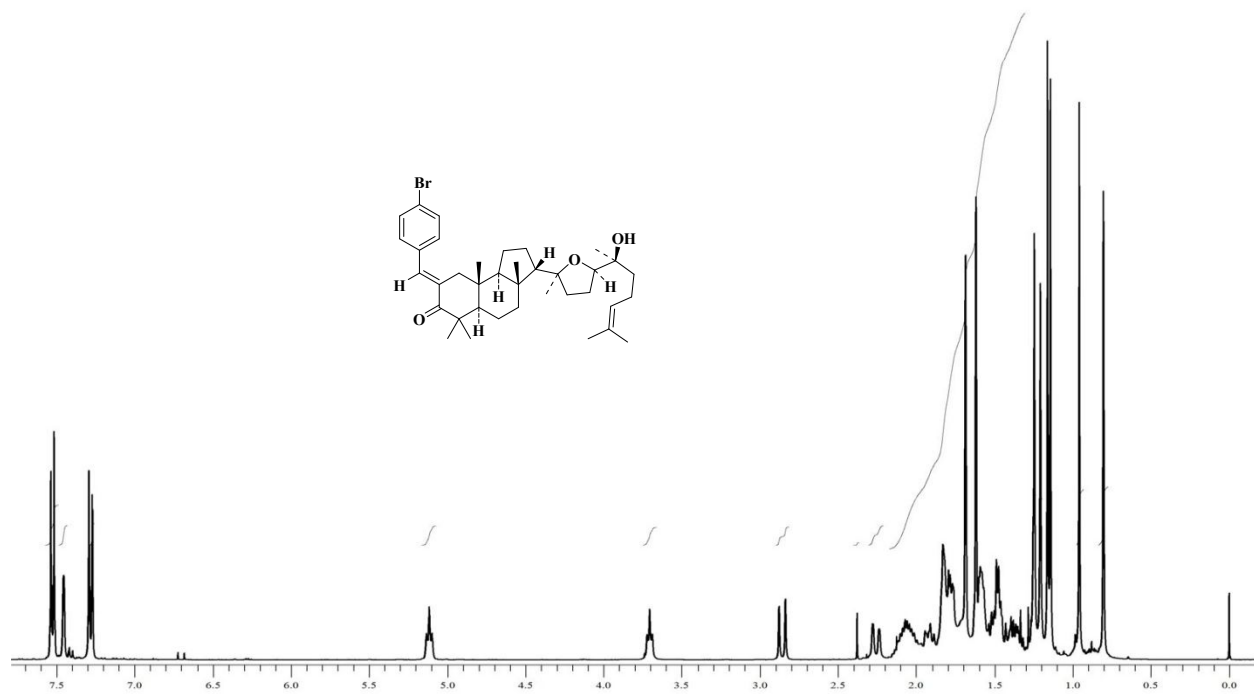

<sup>1</sup>H NMR spectrum of compound 2k in CDCl<sub>3</sub>

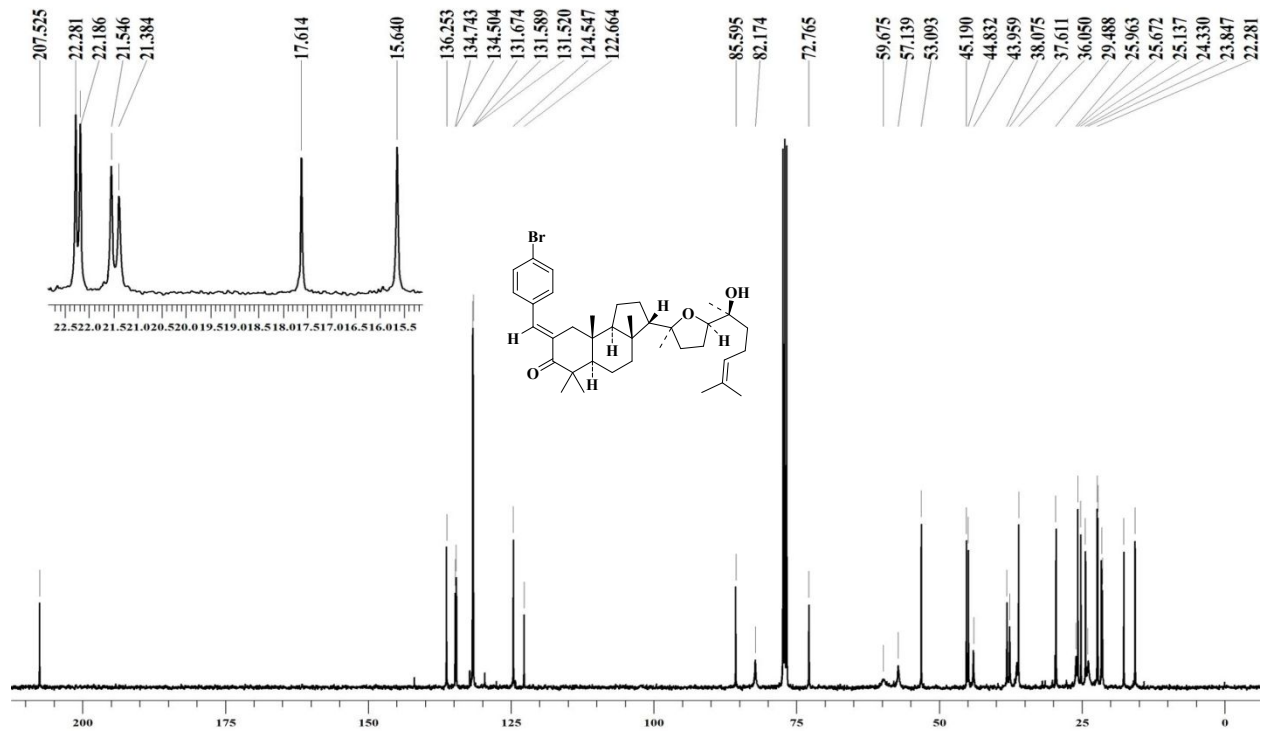

<sup>13</sup>C NMR spectrum of compound 2k in CDCl<sub>3</sub>

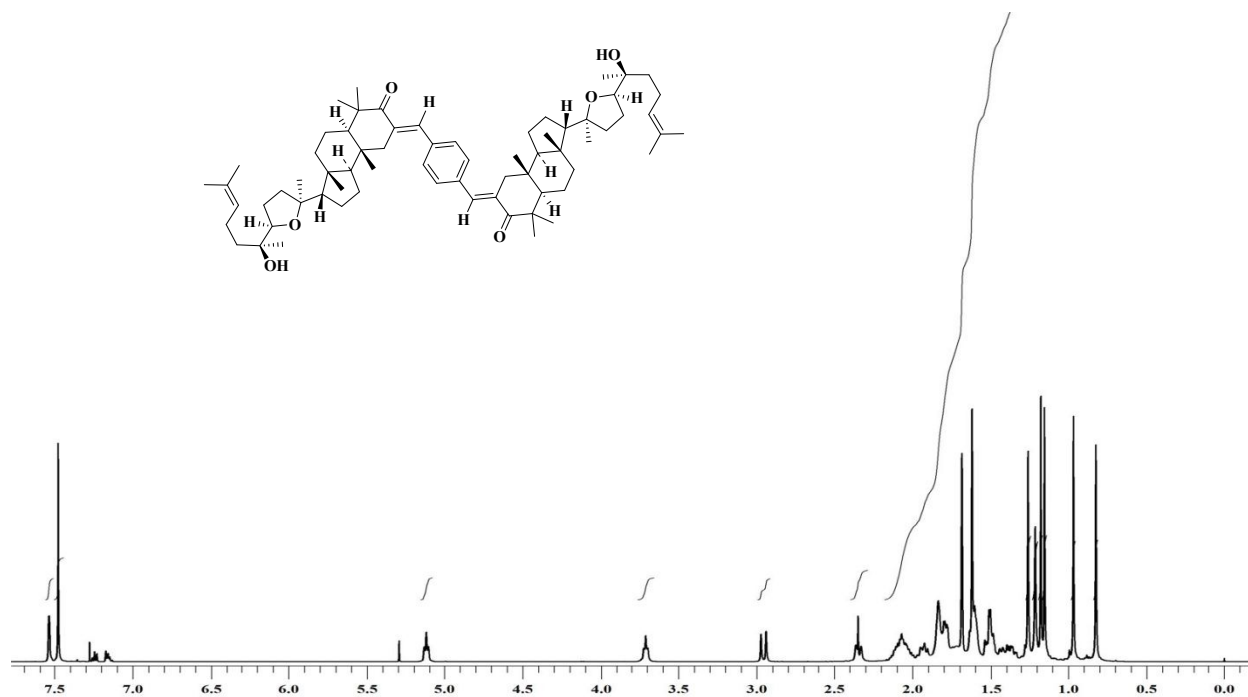

<sup>1</sup>H NMR spectrum of compound 2l in CDCl<sub>3</sub>

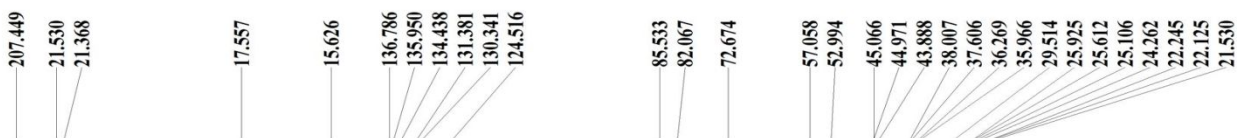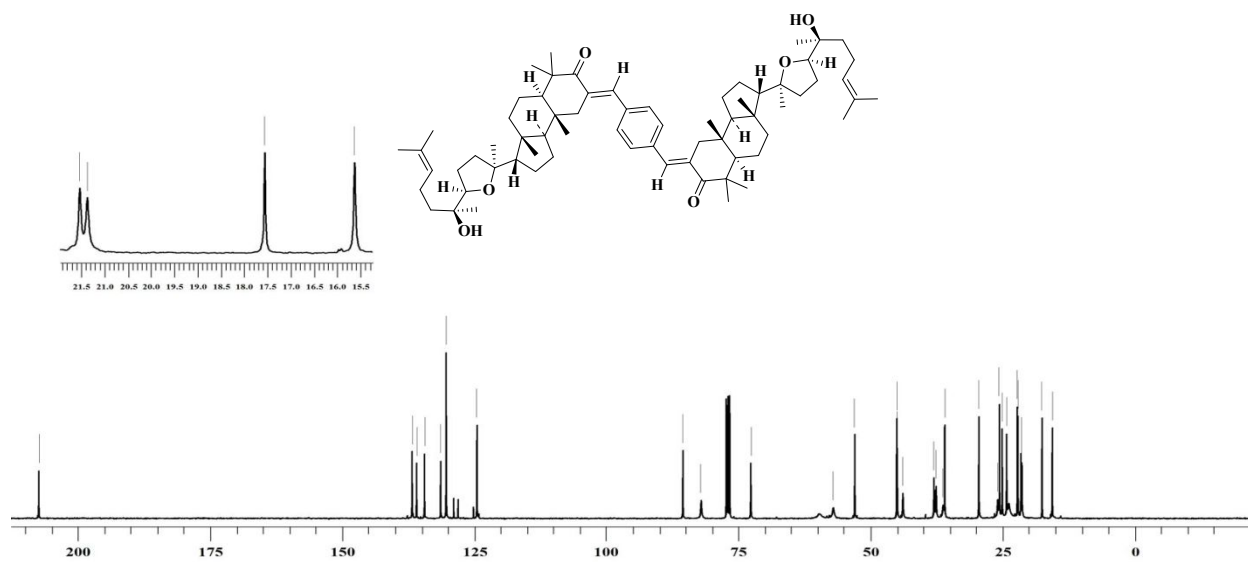

<sup>13</sup>C NMR spectrum of compound 2l in CDCl<sub>3</sub>

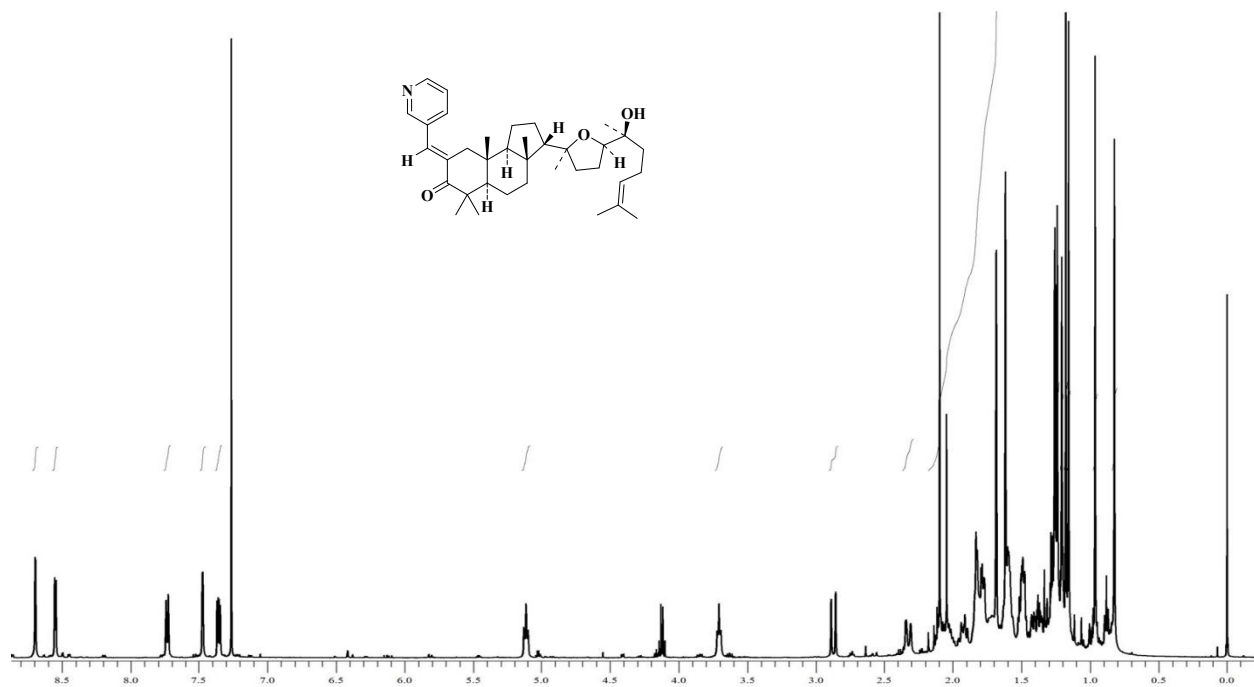

<sup>1</sup>H NMR spectrum of compound 2m in CDCl<sub>3</sub>

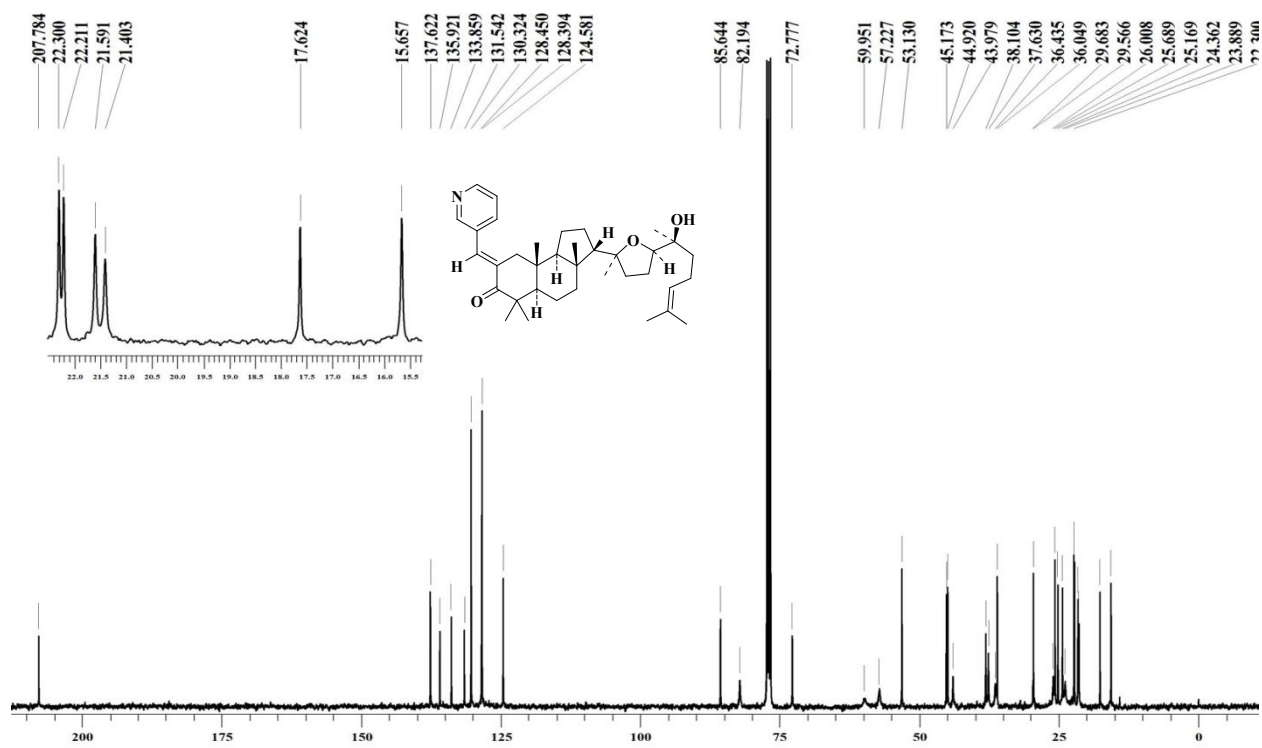

<sup>13</sup>C NMR spectrum of compound 2m in CDCl<sub>3</sub>

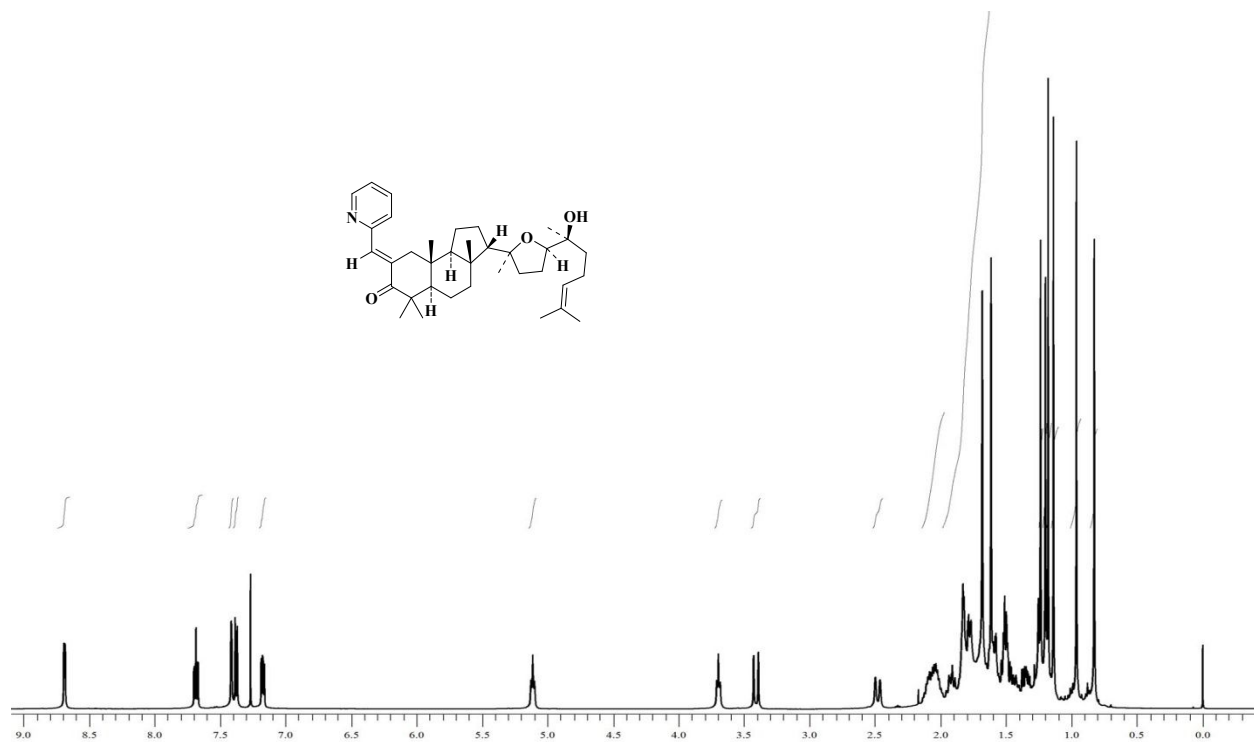

<sup>1</sup>H NMR spectrum of compound 2n in CDCl<sub>3</sub>

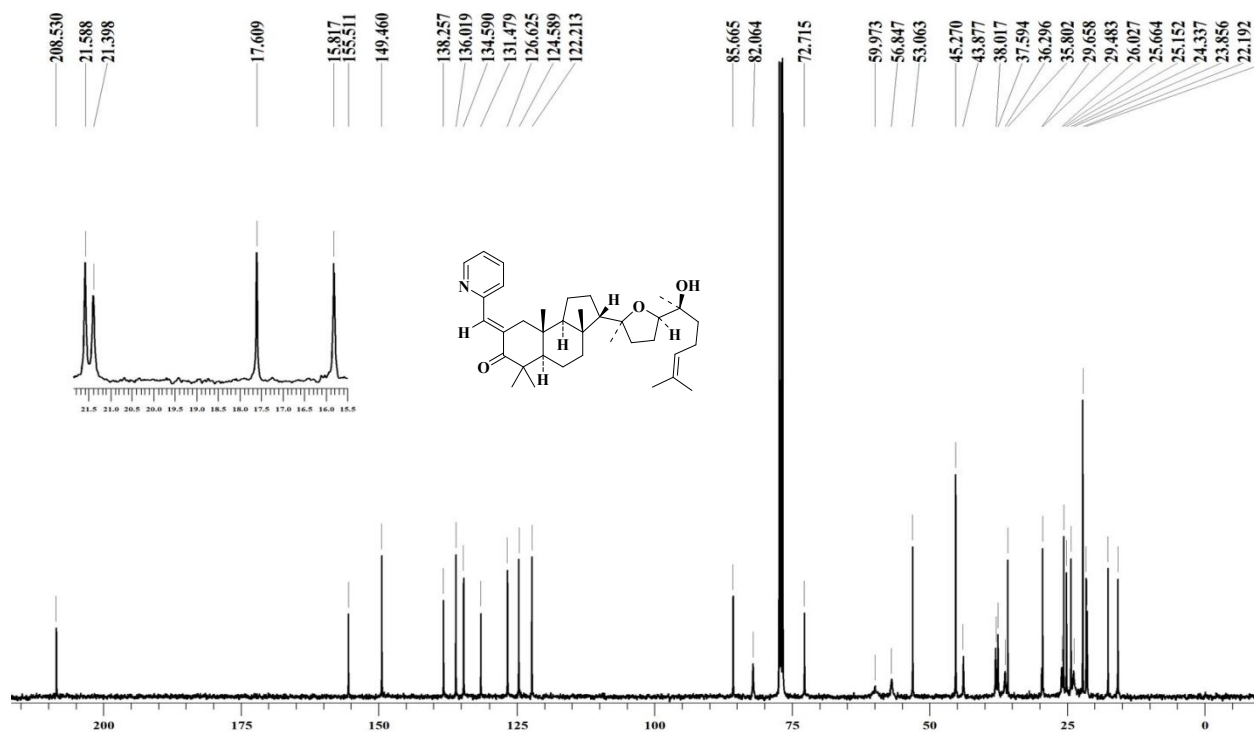

<sup>13</sup>C NMR spectrum of compound 2n in CDCl<sub>3</sub>

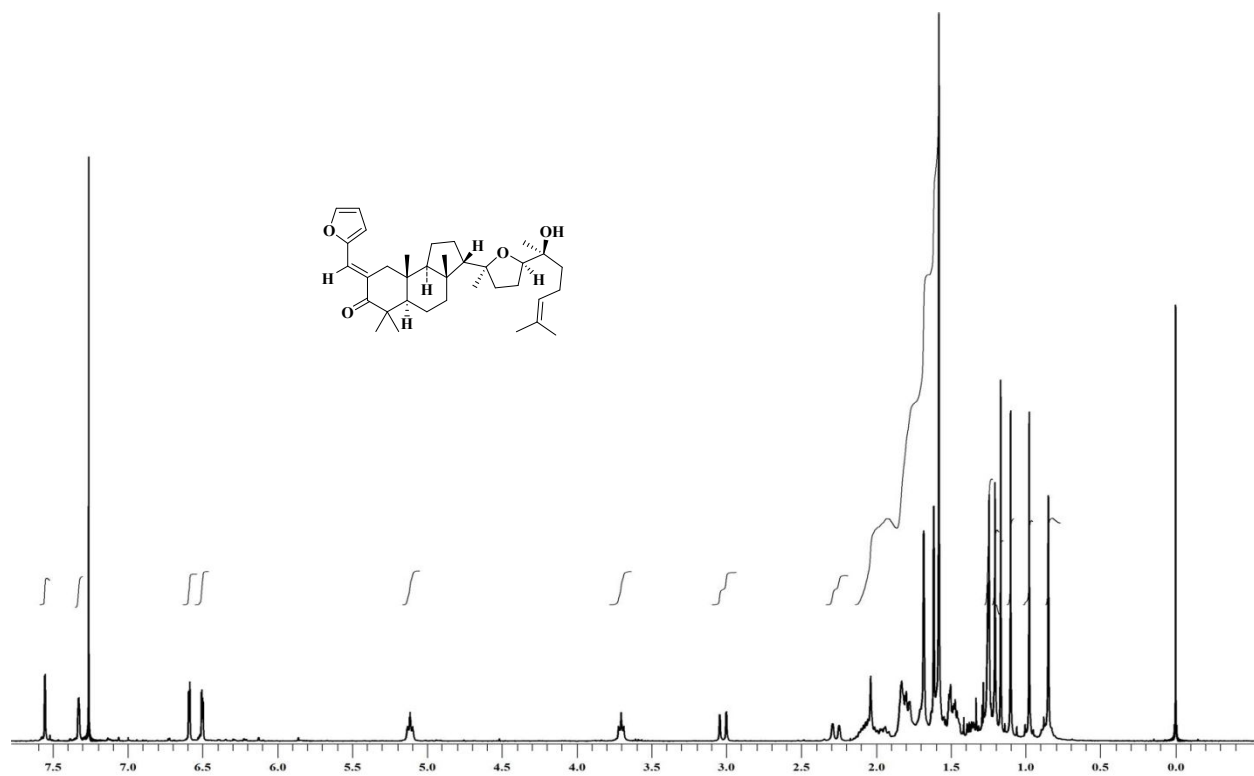

<sup>1</sup>H NMR spectrum of compound 2o in CDCl<sub>3</sub>

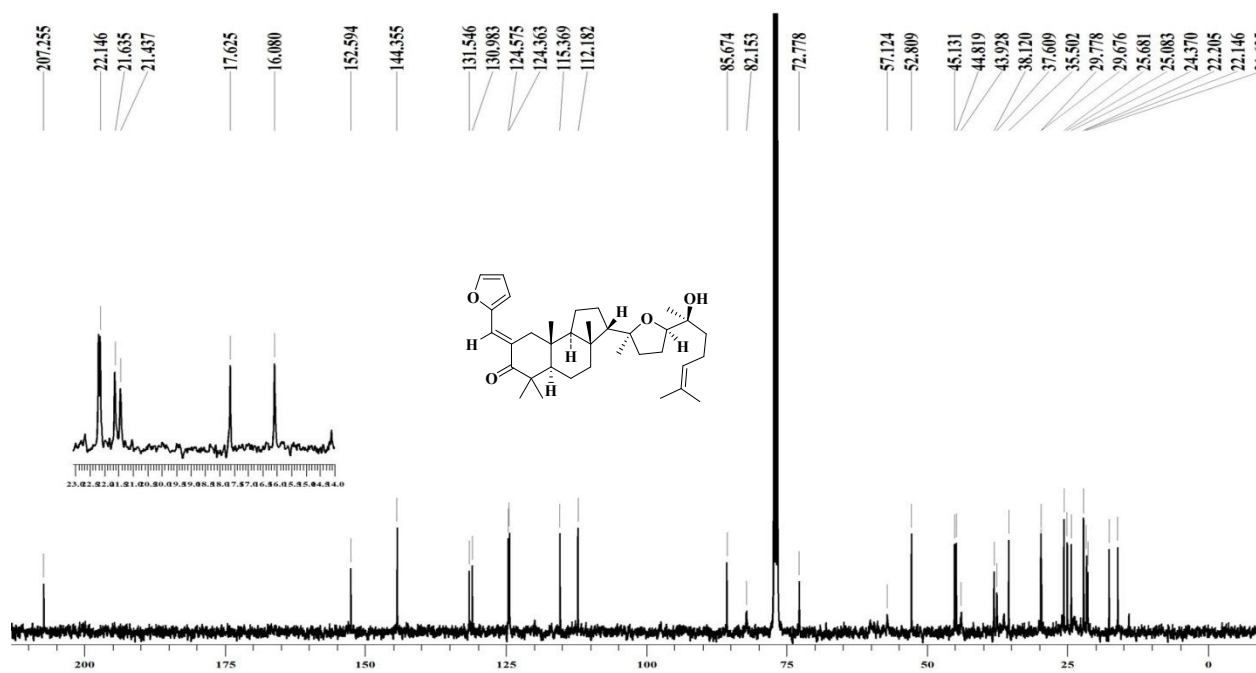

<sup>13</sup>C NMR spectrum of compound 2o in CDCl<sub>3</sub>

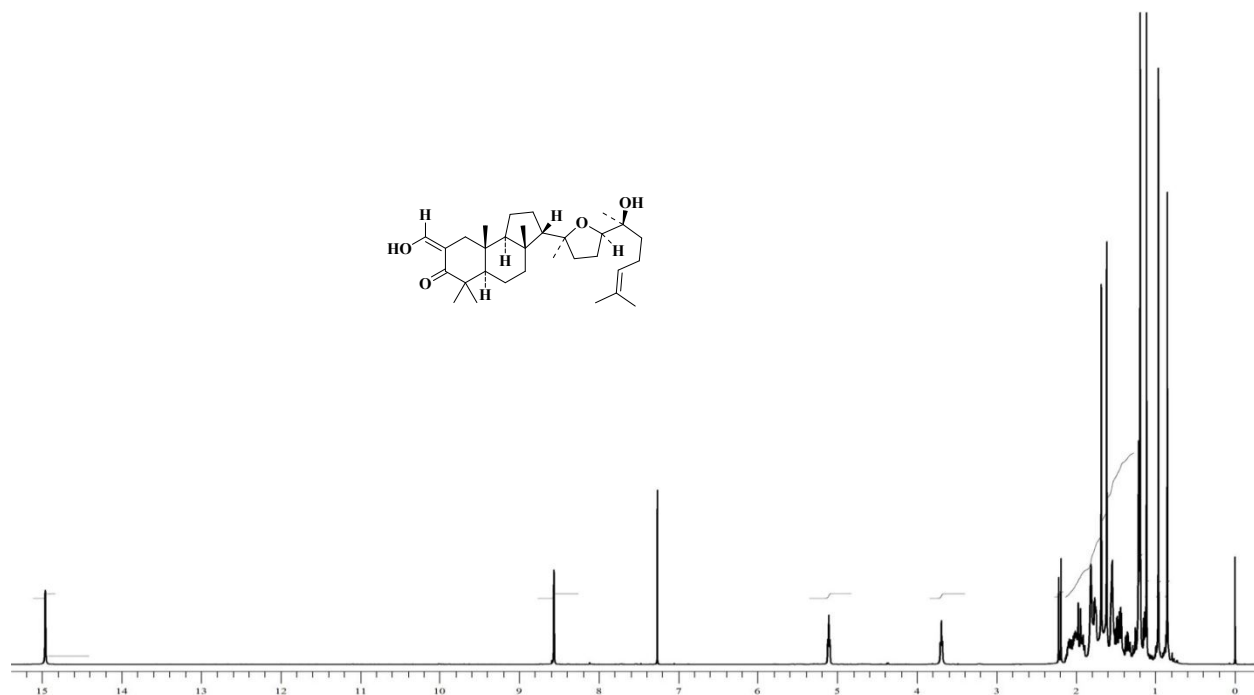

**$^1\text{H}$  NMR spectrum of compound 3 in  $\text{CDCl}_3$**

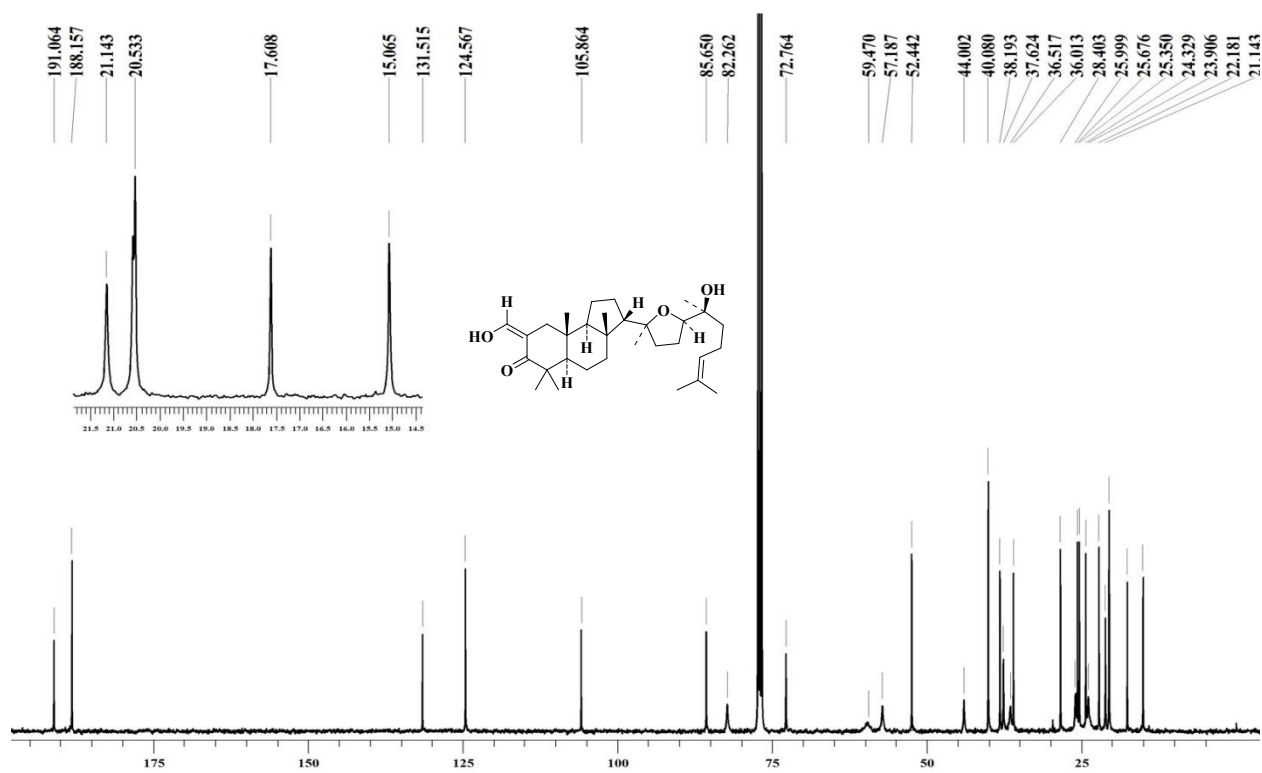

**$^{13}\text{C}$  NMR spectrum of compound 3 in  $\text{CDCl}_3$**



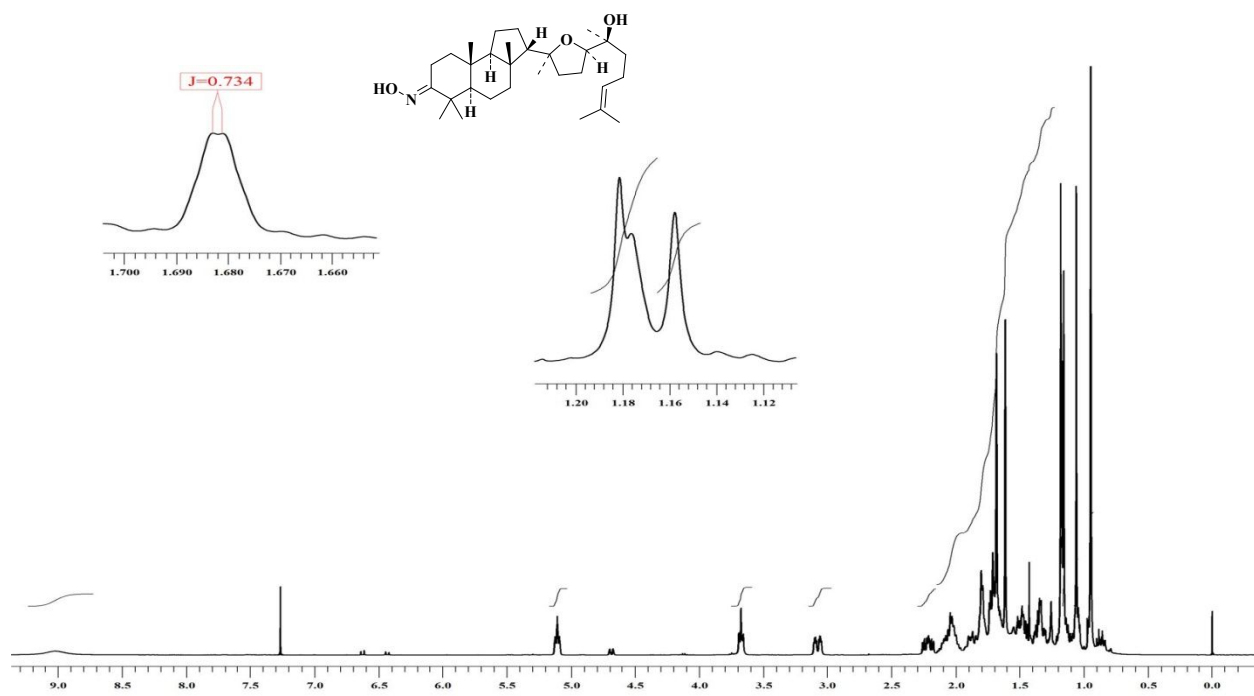

$^1\text{H}$  NMR spectrum of compound 4 in  $\text{CDCl}_3$

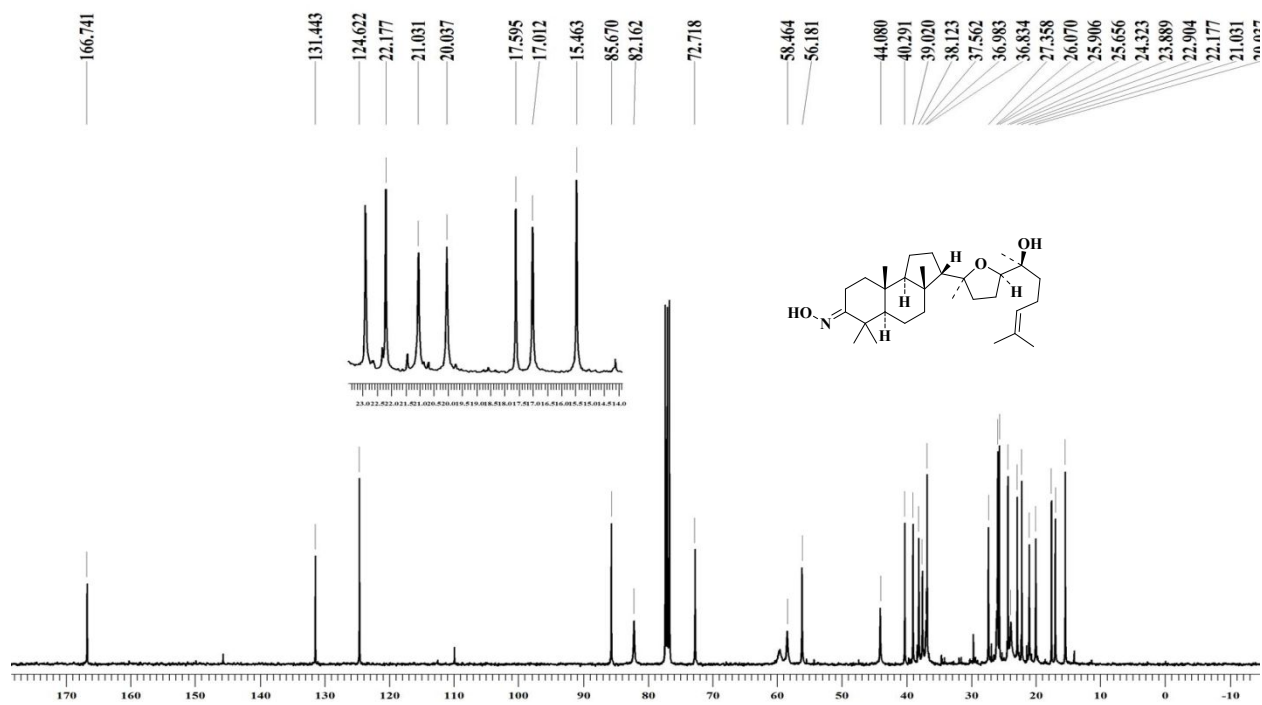

$^{13}\text{C}$  NMR spectrum of compound 4 in  $\text{CDCl}_3$

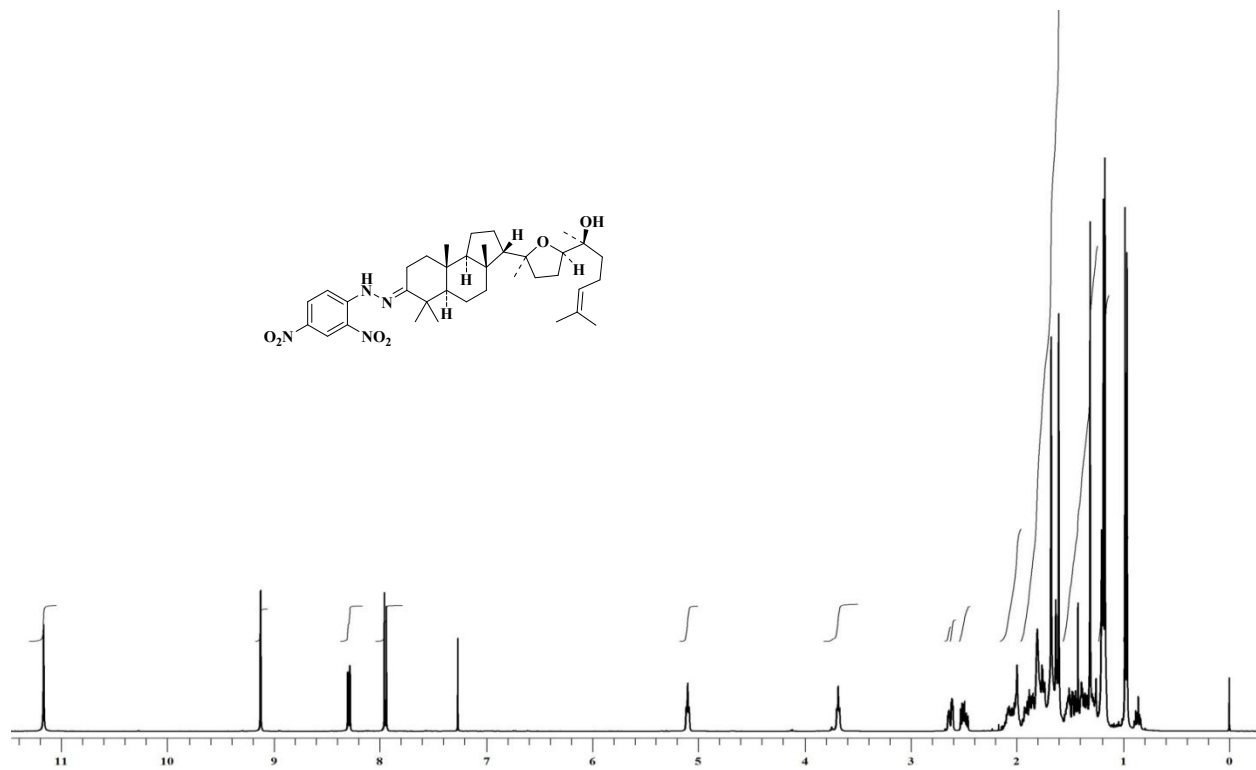

<sup>1</sup>H NMR spectrum of compound 5 in CDCl<sub>3</sub>

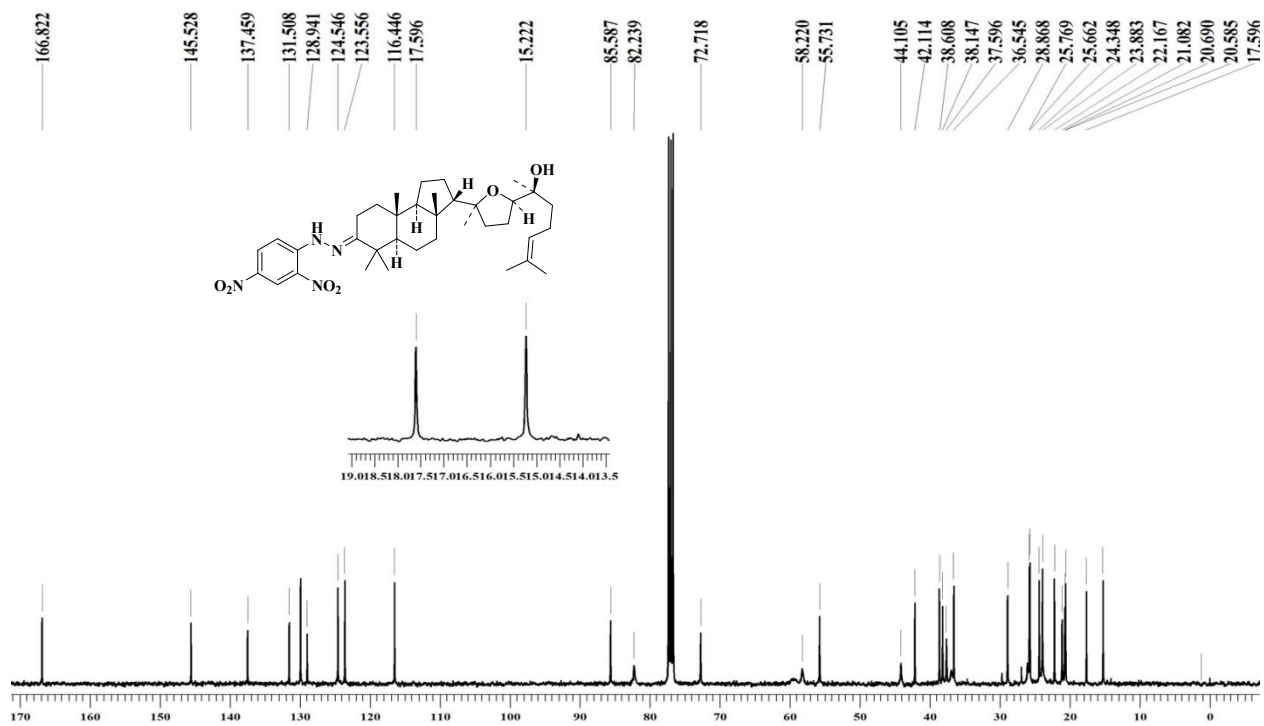

<sup>13</sup>C NMR spectrum of compound 5 in CDCl<sub>3</sub>

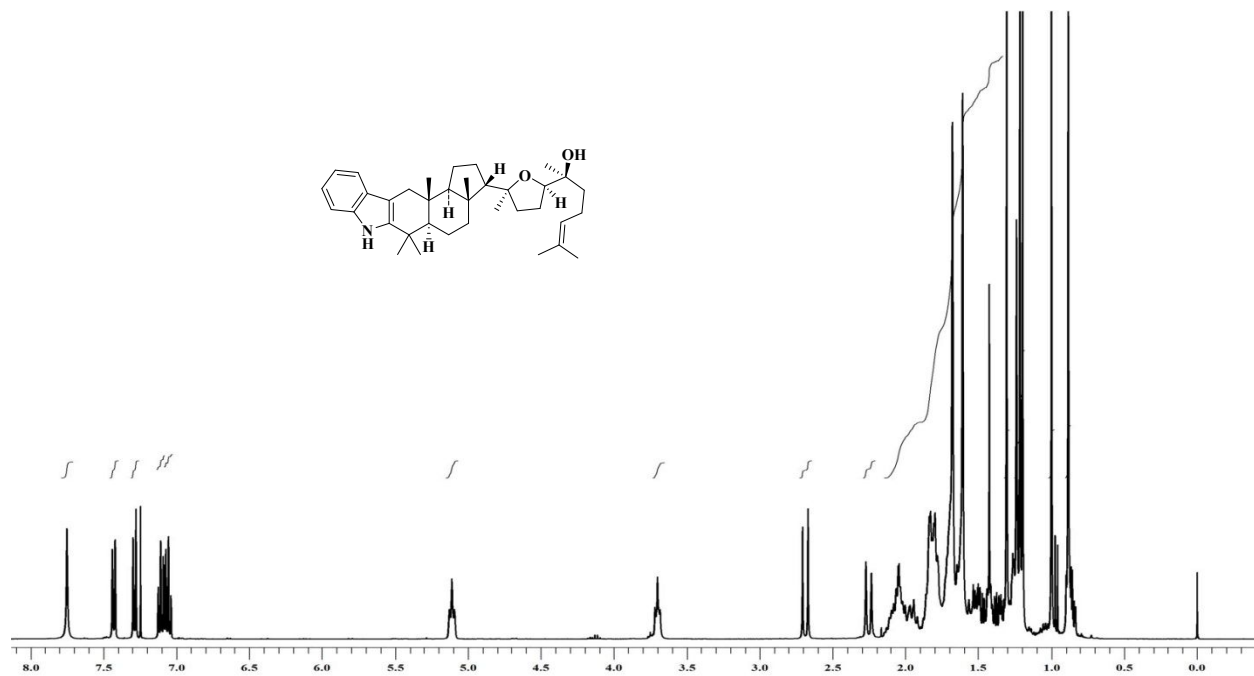

**<sup>1</sup>H NMR spectrum of compound 6a in CDCl<sub>3</sub>**

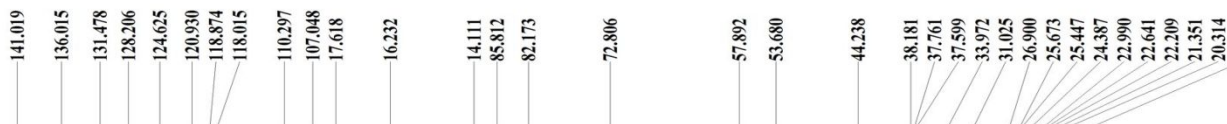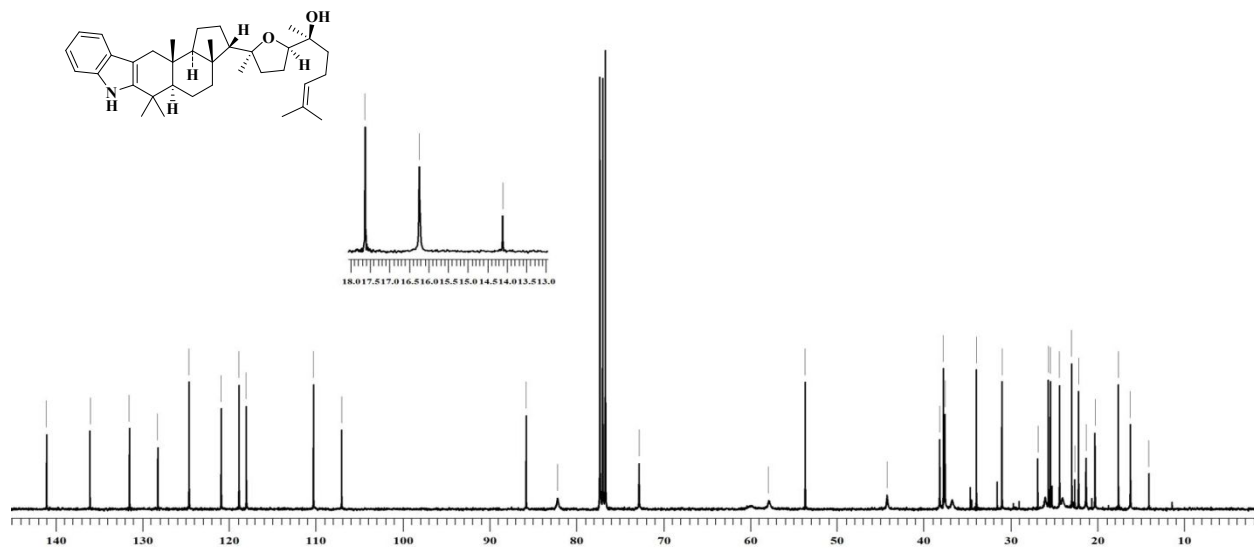

**<sup>13</sup>C NMR spectrum of compound 6a in CDCl<sub>3</sub>**

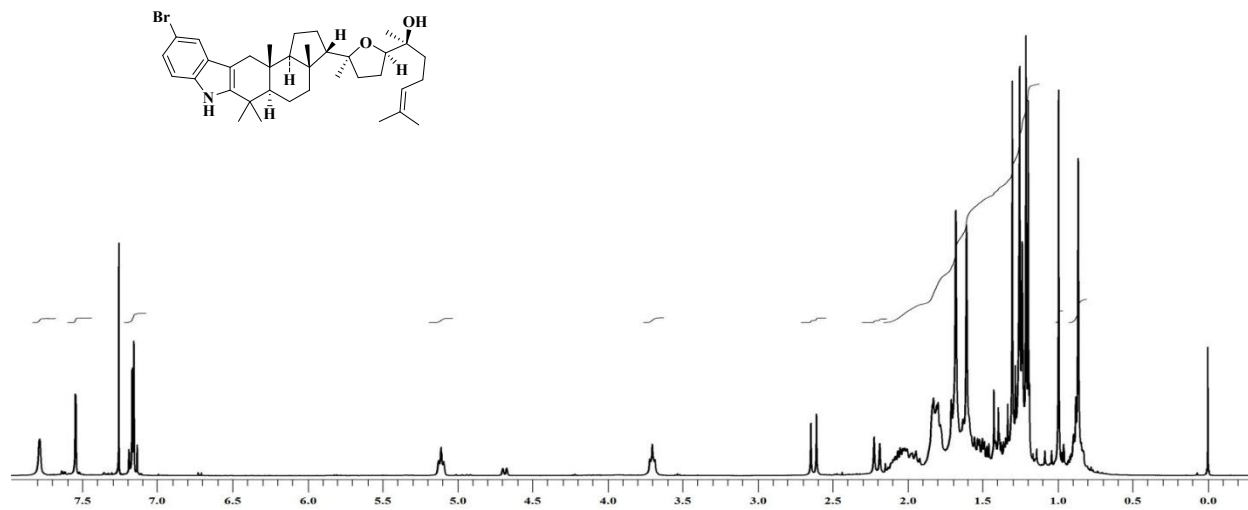

**$^1\text{H}$  NMR spectrum of compound 6b in  $\text{CDCl}_3$**

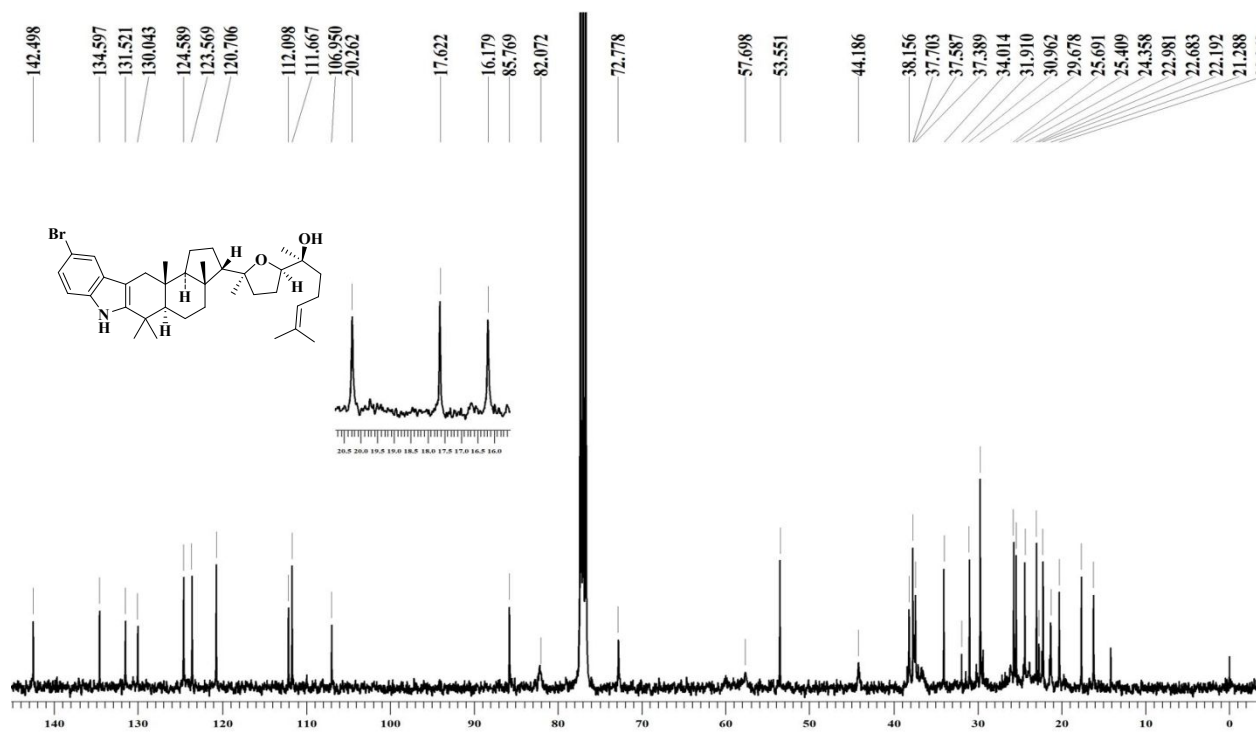

**$^{13}\text{C}$  NMR spectrum of compound 6b in  $\text{CDCl}_3$**

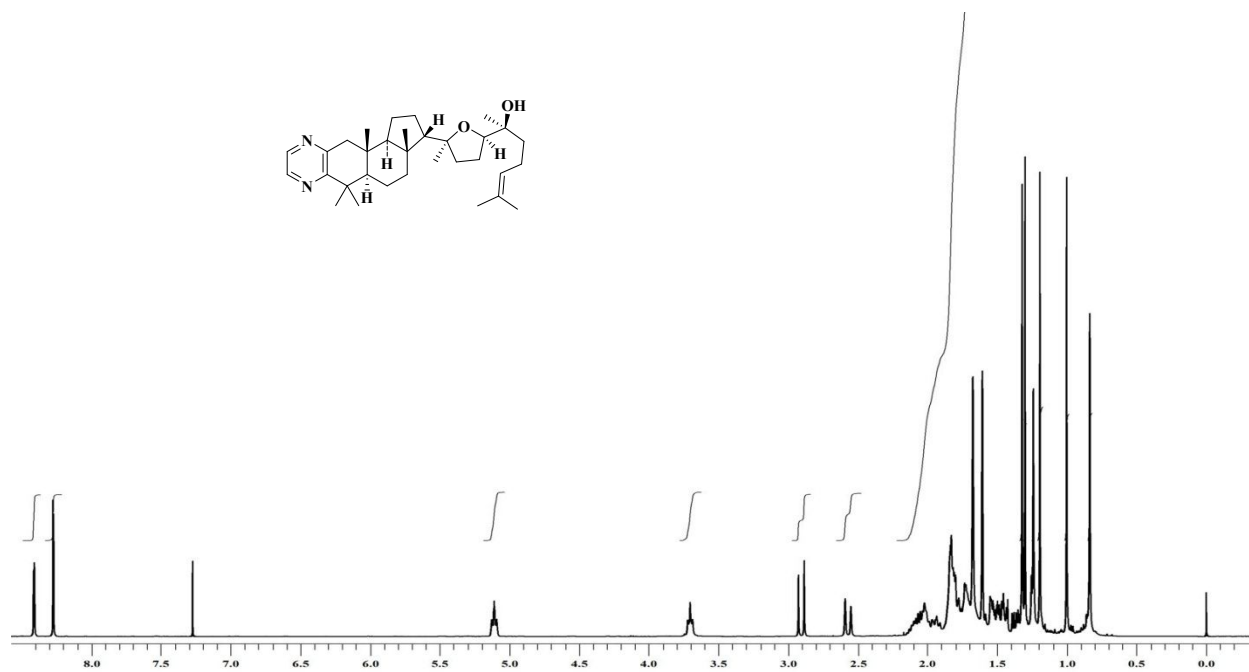

<sup>1</sup>H NMR spectrum of compound 7 in CDCl<sub>3</sub>

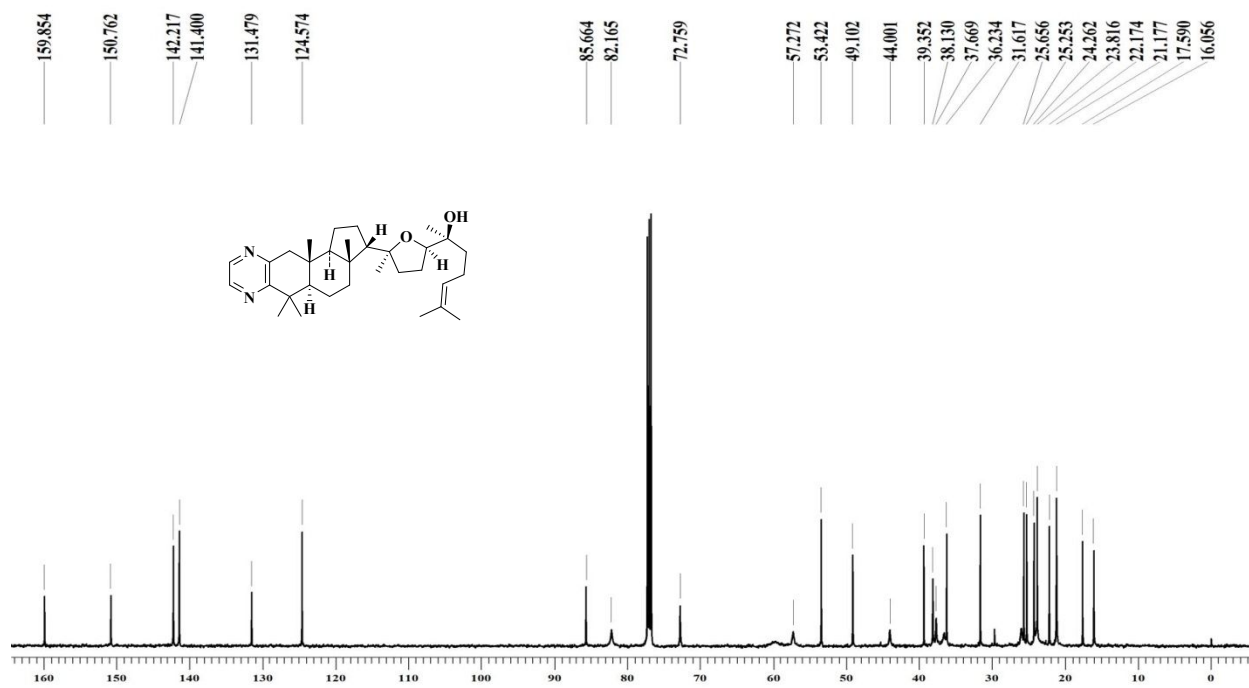

<sup>13</sup>C NMR spectrum of compound 7 in CDCl<sub>3</sub>
